# Supplementary material for: Copper-catalyzed tandem N-arylation/condensation: synthesis of quinazolin-4(3H)-ones from 2-halobenzonitriles and amides
Source: Royal Society of Chemistry journal article supplement (doi:10.1039/c4ra08031a), 2014-01-01

## Supporting Information

### Copper-Catalyzed Tandem *N*-Arylation/Condensation: Synthesis of Quinazolin-4(3*H*)-ones from 2-Halobenzonitrile and Amides

Hongxin Chai<sup>a</sup>, Jiarong Li<sup>a</sup>, Liupan Yang<sup>b</sup>, Hongyan Lu<sup>a</sup>, Zhang Qi<sup>a</sup> and Daxin Shi<sup>a,\*</sup>

<sup>a</sup> School of Chemical Engineering and Environment, Beijing Institute of Technology, Beijing 100081, China.

<sup>b</sup> Jiangsu Hengrui Medicine Co., Ltd., No.7 Kunlunshan Road, Lianyungang Eco & Tech Development Zone, Jiangsu Province 222047, China.

Fax: +86(10)68918012; E-mail: [shidaxin@bit.edu.cn](mailto:shidaxin@bit.edu.cn).

#### Content

|                                                                                                    |    |
|----------------------------------------------------------------------------------------------------|----|
| General information                                                                                | P1 |
| General experimental procedure for the synthesis of quinazolin-4(3 <i>H</i> )-ones ( <b>3a-r</b> ) | P1 |
| The characterization data of products <b>3a-r</b>                                                  | P2 |
| References                                                                                         | P4 |
| The <sup>1</sup> H-NMR and <sup>13</sup> C-NMR Spectra of products                                 | P5 |

#### General information

Unless otherwise noted, all chemicals were purchased from commercial suppliers and were used without further purification. All experiments were monitored by thin layer chromatography (TLC) and visualized under 254 nm UV light. Column chromatography was performed on Silicycle silica gel (200-300 mesh). Melting points were determined using XT4 micro-scope melting point apparatus. Infrared spectra was recorded on a Perkin Elmer FT-IR spectrophotometer with KBr pellets. <sup>1</sup>H and <sup>13</sup>C NMR spectra were recorded at a Varian mercury-plus 400 spectrometer in DMSO-*d*<sub>6</sub> with TMS as the internal standard. ESI-MS was carried out on a Bruker APE XII FT-ICR using ESI ionization. HR-MS was recorded on a APEX IV FT-ICR Mass Spectrometer (Bruker, U.S.A.).

#### General experimental procedure for the synthesis of quinazolin-4(3*H*)-ones

A 25 ml vial equipped with a magnetic stirring bar was charged with 2-halobenzonitrile (1.0 mmol), amides (1.0 mmol), CuI (5 % mmol), NaOH (1.2 mmol), NMP (5.0 ml). The reaction proceeded under an air atmosphere and heated for 12 h at 120 °C. After completion of the reaction (monitored by TLC), the reaction mixture was cooled to room temperature and diluted in ethyl acetate and washed with water. The aqueous phase was extracted twice with ethyl acetate. The organic layers were combined, dried over anhydrous Na<sub>2</sub>SO<sub>4</sub>, and the solvent was removed under reduced pressure and the crude product was purified by column chromatography or recrystallization using petroleum ether/EtOAc to provide the analytically pure product **3**.

### 2-phenylquinazolin-4(3H)-one (3a)

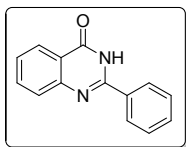

White crystal; m.p. 240-242°C (Ref.<sup>1</sup> 234-236°C); IR (KBr,  $\nu$ ,  $\text{cm}^{-1}$ ): 3194, 3167, 3061, 1668, 1602, 1481; <sup>1</sup>H NMR (400 MHz, DMSO-*d*<sub>6</sub>) ( $\delta$ , ppm): 12.57 (s, 1H), 8.20-8.16 (m, 3H), 7.85 (t,  $J = 15.2$  Hz, 1H), 7.75 (d,  $J = 7.2$  Hz, 6H), 7.62-7.52 (m, 4H); <sup>13</sup>C NMR (100 MHz, DMSO-*d*<sub>6</sub>) ( $\delta$ , ppm): 162.25, 152.30, 148.75, 134.59, 132.71, 131.38, 128.60 (2C), 127.76 (2C), 127.50, 126.58, 125.84, 120.98; ESI-MS ( $m/z$ ) = 222.9 ([M+H]<sup>+</sup>).

### 2-(p-tolyl)quinazolin-4(3H)-one (3b)

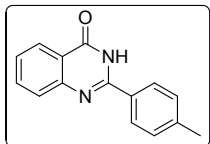

Light yellow crystal; m.p. 250-252°C (Ref.<sup>2</sup> 256-257°C); IR (KBr,  $\nu$ ,  $\text{cm}^{-1}$ ): 3175, 3132, 3063, 1663, 1601, 1485; <sup>1</sup>H NMR (400 MHz, DMSO-*d*<sub>6</sub>) ( $\delta$ , ppm): 12.49 (s, 1H), 8.16-8.09 (m, 3H), 7.83 (t,  $J = 13.2$  Hz, 1H), 7.73 (d,  $J = 8.0$  Hz, 1H), 7.52 (t,  $J = 13.2$  Hz, 1H); 7.36 (d,  $J = 7.6$  Hz, 2H), 2.40 (s, 3H); <sup>13</sup>C NMR (100 MHz, DMSO-*d*<sub>6</sub>) ( $\delta$ , ppm): 162.72, 152.67, 149.30, 135.02, 130.35, 129.64 (2C), 128.14 (2C), 127.88, 126.85, 126.30, 121.37, 21.45; ESI-MS ( $m/z$ ) = 237.5 ([M+H]<sup>+</sup>).

### 2-(4-methoxyphenyl)quinazolin-4(3H)-one (3c)

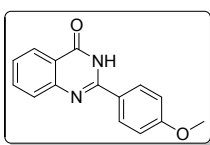

Light yellow crystal; m.p. 258-259°C (Ref.<sup>2</sup> 250-251°C); IR (KBr,  $\nu$ ,  $\text{cm}^{-1}$ ): 3176, 3133, 3066, 1677, 1601, 1483; <sup>1</sup>H NMR (400 MHz, DMSO-*d*<sub>6</sub>) ( $\delta$ , ppm): 12.42 (s, 1H), 8.19 (d,  $J = 8.4$  Hz, 2H), 8.13 (d,  $J = 8.0$  Hz, 1H), 7.82 (t,  $J = 15.2$  Hz, 1H), 7.70 (d,  $J = 7.6$  Hz, 1H), 7.48 (t,  $J = 15.2$  Hz, 1H), 7.09 (d,  $J = 8.4$  Hz, 2H), 3.85 (s, 3H); <sup>13</sup>C NMR (100 MHz, DMSO-*d*<sub>6</sub>) ( $\delta$ , ppm): 162.77, 162.33, 152.32, 149.40, 135.00, 129.92 (2C), 127.75, 126.59, 125.26, 121.15, 114.46 (2C), 55.92; ESI-MS ( $m/z$ ) = 253.1 ([M+H]<sup>+</sup>).

### 2-(4-fluorophenyl)quinazolin-4(3H)-one (3d)

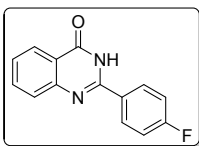

Yellow solid; m.p. 262-265°C (Ref.<sup>1</sup> 284-287°C); IR (KBr,  $\nu$ ,  $\text{cm}^{-1}$ ): 3174, 3132, 3049, 1681, 1611, 1484; <sup>1</sup>H NMR (400 MHz, DMSO-*d*<sub>6</sub>) ( $\delta$ , ppm): 12.59 (s, 1H), 8.27-8.23 (m, 2H), 8.15 (d,  $J = 8.0$  Hz, 1H), 7.84 (t,  $J = 5.2$  Hz, 1H), 7.74 (d,  $J = 8.0$  Hz, 1H), 7.53 (t,  $J = 14.8$  Hz, 1H), 7.40 (t,  $J = 16.8$  Hz, 2H); <sup>13</sup>C NMR (100 MHz, DMSO-*d*<sub>6</sub>) ( $\delta$ , ppm): 164.51 (d,  $J = 198.4$  Hz), 162.67, 151.84, 149.12, 135.11, 130.85 (d,  $J = 7.1$  Hz), 129.70 (d,  $J = 2.1$  Hz), 127.93, 127.09, 126.32, 121.35, 116.10 (d,  $J = 17.4$  Hz); ESI-MS ( $m/z$ ) = 241.0 ([M+H]<sup>+</sup>).

### 2-(3-fluorophenyl)quinazolin-4(3H)-one (3e)

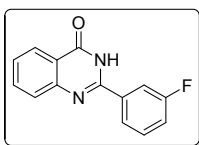

Light yellow crystal; m.p. 261-263°C (Ref.<sup>3</sup> 267°C); IR (KBr,  $\nu$ ,  $\text{cm}^{-1}$ ): 3192, 3161, 3055, 1682, 1608, 1480; <sup>1</sup>H NMR (400 MHz, DMSO-*d*<sub>6</sub>) ( $\delta$ , ppm): 12.62 (s, 1H), 8.17 (d,  $J = 7.6$  Hz, 1H), 8.07-8.00 (m, 2H), 7.86 (t,  $J = 14.0$  Hz, 1H), 7.76 (d,  $J = 8.4$  Hz, 1H), 7.63-7.53 (m, 2H), 7.47-7.43 (m, 1H); <sup>13</sup>C NMR (100 MHz, DMSO-*d*<sub>6</sub>) ( $\delta$ , ppm): 162.58, 162.55 (d,  $J = 193.9$  Hz), 151.48, 148.92, 135.47 (d,  $J = 6.3$  Hz), 135.17, 131.21 (d,  $J = 6.5$  Hz), 128.07, 127.39, 126.34, 124.40 (d,  $J = 1.9$  Hz), 121.59, 118.73 (d,  $J = 16.7$  Hz), 115.00 (d,  $J = 18.9$  Hz); ESI-MS ( $m/z$ ) = 241.0 ([M+H]<sup>+</sup>).

### 2-methylquinazolin-4(3H)-one (3f)<sup>4</sup>

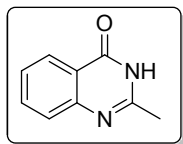

White crystal; m.p. 236-237°C; IR (KBr,  $\nu$ ,  $\text{cm}^{-1}$ ): 3170, 3120, 2869, 1681, 1615, 1468; <sup>1</sup>H NMR (400 MHz, DMSO-*d*<sub>6</sub>) ( $\delta$ , ppm): 12.20 (s, 1H), 8.06 (d,  $J = 8.0$  Hz, 1H), 7.77-7.73 (m, 1H), 7.56 (d,  $J = 8.4$  Hz, 1H), 7.44 (t,  $J = 14.8$  Hz, 1H), 2.34 (s, 1H); <sup>13</sup>C NMR (100 MHz, DMSO-*d*<sub>6</sub>) ( $\delta$ , ppm): 161.69, 154.25, 148.98, 134.27, 126.58, 125.85, 125.67, 120.61, 21.42; ESI-MS ( $m/z$ ) = 161.0 ([M+H]<sup>+</sup>).

### 2-ethylquinazolin-4(3H)-one (3g)

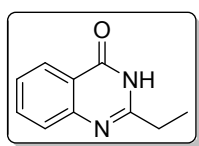

White crystal; m.p. 230-232°C (Ref.<sup>5</sup> 229-231°C); IR (KBr,  $\nu$ ,  $\text{cm}^{-1}$ ): 3169, 3111, 2980, 1679, 1620, 1468; <sup>1</sup>H NMR (400 MHz, DMSO-*d*<sub>6</sub>) ( $\delta$ , ppm): 12.16 (s, 1H), 8.07 (d,  $J = 8.0$  Hz, 1H), 7.79-7.75 (m, 1H), 7.59 (d,  $J = 8.0$  Hz, 1H), 7.45 (t,  $J = 14.4$  Hz, 1H), 2.65-2.59 (m, 2H), 1.24 (t,  $J = 14.8$  Hz, 3H); <sup>13</sup>C NMR (100 MHz, DMSO-*d*<sub>6</sub>) ( $\delta$ , ppm): 162.26, 158.77, 149.43, 134.69,

127.27, 126.35, 126.14, 121.30, 28.30, 11.73; ESI-MS ( $m/z$ ) = 175.0 ([M+H]<sup>+</sup>).

### 2-propylquinazolin-4(3H)-one (3h)

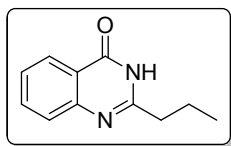

White crystal; m.p. 206-207°C (Ref.<sup>5</sup> 200-202°C); IR (KBr,  $\nu$ , cm<sup>-1</sup>): 3174, 3132, 3049, 1681, 1611, 1484; <sup>1</sup>H NMR (400 MHz, DMSO-*d*<sub>6</sub>) ( $\delta$ , ppm): 12.18 (s, 1H), 8.07 (d,  $J$  = 7.6 Hz, 1H), 7.76 (t,  $J$  = 14.8 Hz, 1H), 7.59 (d,  $J$  = 8.0 Hz, 1H), 7.45 (t,  $J$  = 15.2 Hz, 1H), 2.56 (t,  $J$  = 14.8 Hz, 2H), 1.74 (d,  $J$  = 15.2 Hz, 2H), 0.94-0.91 (m, 3H); <sup>13</sup>C NMR (100 MHz, DMSO-*d*<sub>6</sub>) ( $\delta$ , ppm): 162.28, 157.76, 149.42, 134.71, 127.26, 126.36, 126.13, 121.26, 36.81, 20.66, 13.96; ESI-MS ( $m/z$ ) = 189.4 ([M+H]<sup>+</sup>).

### 2-isopropylquinazolin-4(3H)-one (3i)

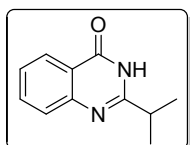

White crystal; m.p. 234-236°C (Ref.<sup>5</sup> 225-228°C); IR (KBr,  $\nu$ , cm<sup>-1</sup>): 3169, 3125, 2969, 1682, 1621, 1471; <sup>1</sup>H NMR (400 MHz, DMSO-*d*<sub>6</sub>) ( $\delta$ , ppm): 12.15 (s, 1H), 8.08 (d,  $J$  = 8.8 Hz, 1H), 7.77 (t,  $J$  = 14.8 Hz, 1H), 7.61 (d,  $J$  = 7.2 Hz, 1H), 7.46 (t,  $J$  = 15.6 Hz, 1H), 2.92-2.85 (m, 1H), 1.26 (d,  $J$  = 7.6 Hz, 6H); <sup>13</sup>C NMR (100 MHz, DMSO-*d*<sub>6</sub>) ( $\delta$ , ppm): 162.41, 162.03, 149.35, 134.71, 127.4, 126.43, 126.13, 121.40, 20.83 (2C); ESI-MS ( $m/z$ ) = 189.4 ([M+H]<sup>+</sup>).

### 7-methyl-2-phenylquinazolin-4(3H)-one (3j)

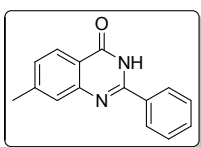

Light yellow solid; m.p. 248-250°C (Ref.<sup>6</sup> 240-241°C); IR (KBr,  $\nu$ , cm<sup>-1</sup>): 3129, 3055, 3035, 1670, 1605, 1457; <sup>1</sup>H NMR (400 MHz, DMSO-*d*<sub>6</sub>) ( $\delta$ , ppm): 12.45 (s, 1H), 8.17 (d,  $J$  = 7.2 Hz, 2H), 8.03 (d,  $J$  = 7.6 Hz, 1H), 7.57 (d,  $J$  = 10.0 Hz, 4H), 7.35 (d,  $J$  = 8.8 Hz, 1H), 2.38 (s, 3H); <sup>13</sup>C NMR (100 MHz, DMSO-*d*<sub>6</sub>) ( $\delta$ , ppm): 162.57, 152.77, 149.32, 145.53, 133.24, 131.80, 129.64, 129.06, 128.48, 128.17, 128.08, 127.62, 126.17, 119.06, 21.83; ESI-MS ( $m/z$ ) = 237.1 ([M+H]<sup>+</sup>).

### 7-methyl-2-propylquinazolin-4(3H)-one (3k)

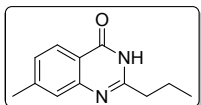

White crystal; m.p. 226-228°C (Ref.<sup>7</sup> 232-234°C); IR (KBr,  $\nu$ , cm<sup>-1</sup>): 3171, 3129, 3043, 1675, 1615, 1461; <sup>1</sup>H NMR (400 MHz, DMSO-*d*<sub>6</sub>) ( $\delta$ , ppm): 12.07 (s, 1H), 7.96 (d,  $J$  = 7.6 Hz, 1H), 7.41 (s, 1H), 7.28 (d,  $J$  = 7.2 Hz, 1H), 2.56 (t,  $J$  = 14.4 Hz, 2H), 2.43 (s, 3H) 1.76-1.69 (m, 2H), 0.93 (t,  $J$  = 14.4 Hz, 3H); <sup>13</sup>C NMR (100 MHz, DMSO-*d*<sub>6</sub>) ( $\delta$ , ppm): 162.17, 157.75, 145.12, 127.76, 125.99, 118.86, 36.77, 21.79, 20.63, 13.94; ESI-MS ( $m/z$ ) = 203.1 ([M+H]<sup>+</sup>).

### 6-methoxy-2-phenylquinazolin-4(3H)-one (3l)

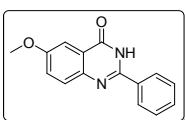

Yellow solid; m.p. 246-248°C (Ref.<sup>2</sup> 247-248°C); IR (KBr,  $\nu$ , cm<sup>-1</sup>): 3161, 3055, 3028, 1672, 1492; <sup>1</sup>H NMR (400 MHz, DMSO-*d*<sub>6</sub>) ( $\delta$ , ppm): 12.51 (s, 1H), 8.16 (d,  $J$  = 6.8 Hz, 2H), 7.70 (d,  $J$  = 8.0 Hz, 2H), 7.59-7.52 (m, 4H), 7.46-7.43 (m, 1H), 3.86 (s, 3H); <sup>13</sup>C NMR (100 MHz, DMSO-*d*<sub>6</sub>) ( $\delta$ , ppm): 162.50, 158.22, 150.55, 143.68, 133.27, 131.50, 130.17, 129.70, 129.04, 127.96, 124.57, 106.35, 56.12; ESI-MS ( $m/z$ ) = 253.1 ([M+H]<sup>+</sup>).

### 2-ethyl-6-methoxyquinazolin-4(3H)-one (3m)

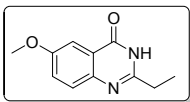

Light yellow solid; m.p. 241-243°C; IR (KBr,  $\nu$ , cm<sup>-1</sup>): 3162, 3014, 1669, 1624, 1488; <sup>1</sup>H NMR (400 MHz, DMSO-*d*<sub>6</sub>) ( $\delta$ , ppm): 12.11 (s, 1H), 7.54 (d,  $J$  = 9.6 Hz, 1H), 7.46 (d,  $J$  = 2.4 Hz, 1H), 7.37 (t,  $J$  = 9.2 Hz, 1H), 3.85 (s, 3H), 2.61-2.56 (m, 2H), 1.23 (t,  $J$  = 14.8 Hz, 3H); <sup>13</sup>C NMR (100 MHz, DMSO-*d*<sub>6</sub>) ( $\delta$ , ppm): 162.09, 157.64, 156.36, 143.90, 128.91, 124.08, 122.00, 106.24, 55.99, 28.10, 11.75; HR-ESI ([M+H]<sup>+</sup>)  $m/z$  calcd for C<sub>11</sub>H<sub>13</sub>N<sub>2</sub>O<sub>2</sub> 205.09715, found 205.09710.

### 6-fluoro-2-phenylquinazolin-4(3H)-one (3n)

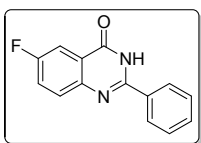

Yellow solid; m.p. 279-281°C (Ref.<sup>8</sup> > 280°C); IR (KBr,  $\nu$ , cm<sup>-1</sup>): 3163, 3104, 3036, 1662, 1605, 1485; <sup>1</sup>H NMR (400 MHz, DMSO-*d*<sub>6</sub>) ( $\delta$ , ppm): 12.67 (s, 1H), 8.17 (d,  $J$  = 6.4 Hz, 2H), 7.81 (t,  $J$  = 13.2 Hz, 2H), 7.75-7.70 (m, 1H), 7.61-7.53 (m, 3H); <sup>13</sup>C NMR (100 MHz, DMSO-*d*<sub>6</sub>) ( $\delta$ , ppm): 162.13 (d,  $J$  = 2.6 Hz), 160.46 (d, = 195.2 Hz), 152.32, 146.10, 133.02, 131.89, 130.80 (d,  $J$  = 6.6 Hz), 129.08, 128.21, 123.55 (d,  $J$  = 19.0 Hz), 122.68 (d,  $J$  = 6.6 Hz), 110.98 (d,  $J$  = 18.6 Hz); ESI-MS ( $m/z$ ) = 241.0

([M+H]<sup>+</sup>).

### 6-fluoro-2-propylquinazolin-4(3H)-one (3o)<sup>9</sup>

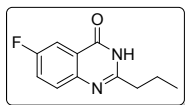

White crystal; m.p. 240-242 °C; IR (KBr,  $\nu$ , cm<sup>-1</sup>): 3184, 3108, 3035, 1670, 1605, 1457; <sup>1</sup>H NMR (400 MHz, DMSO-*d*<sub>6</sub>) ( $\delta$ , ppm): 12.29 (s, 1H), 7.73 (t,  $J$  = 10.4 Hz, 1H), 7.65 (t,  $J$  = 9.6 Hz, 2H), 2.57 (t,  $J$  = 15.6 Hz, 2H), 1.76-1.70 (m, 2H), 0.92 (t,  $J$  = 14.8 Hz, 3H); <sup>13</sup>C NMR (100 MHz, DMSO-*d*<sub>6</sub>) ( $\delta$ , ppm): 161.65 (d,  $J$  = 2.6 Hz), 160.03 (d,  $J$  = 194.3 Hz), 157.20 (d,  $J$  = 1.2 Hz), 146.26, 130.09 (d,  $J$  = 6.6 Hz), 123.06 (d,  $J$  = 19.0 Hz), 122.40 (d,  $J$  = 6.6 Hz), 110.66 (d,  $J$  = 18.4 Hz), 36.70, 20.58, 13.90; ESI-MS ( $m/z$ ) = 207.0 ([M+H]<sup>+</sup>).

### 2-phenyl-6-(trifluoromethyl)quinazolin-4(3H)-one (3p)

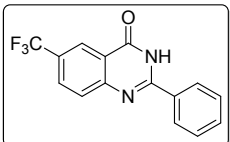

White solid; m.p. > 300 °C; IR (KBr,  $\nu$ , cm<sup>-1</sup>): 3167, 3108, 3052, 3028, 1671, 1626, 1602, 1317; <sup>1</sup>H NMR (400 MHz, DMSO-*d*<sub>6</sub>) ( $\delta$ , ppm): 12.88 (s, 1H), 8.39 (s, 1H), 8.21 (d,  $J$  = 7.2 Hz, 2H), 8.14 (t,  $J$  = 8.4 Hz, 1H), 7.92 (d,  $J$  = 8.4 Hz, 1H), 7.63-7.56 (m, 3H); <sup>13</sup>C NMR (100 MHz, DMSO-*d*<sub>6</sub>) ( $\delta$ , ppm): 162.14, 155.16, 151.75, 132.75, 132.42, 130.98, 129.44, 129.15, 128.55, 126.88 (q,  $J$  = 26.0 Hz), 124.35 (q,  $J$  = 216.4 Hz), 123.78 (q,  $J$  = 3.1 Hz), 121.53; HR-ESI ([M+H]<sup>+</sup>)  $m/z$  calcd for C<sub>15</sub>H<sub>10</sub>F<sub>3</sub>N<sub>2</sub>O 291.07397; found 291.07378.

### 2-ethyl-6-(trifluoromethyl)quinazolin-4(3H)-one (3q)

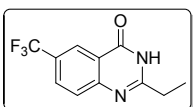

White solid; m.p. 260-261 °C; IR (KBr,  $\nu$ , cm<sup>-1</sup>): 3172, 3111, 3047, 3019, 1689, 1614, 1319; <sup>1</sup>H NMR (400 MHz, DMSO-*d*<sub>6</sub>) ( $\delta$ , ppm): 12.50 (s, 1H), 8.31 (s, 1H), 8.06-8.04 (m, 1H), 7.77 (d,  $J$  = 8.4 Hz, 1H), 2.69-2.63 (m, 2H), 1.25 (t,  $J$  = 15.6 Hz, 3H); <sup>13</sup>C NMR (100 MHz, DMSO-*d*<sub>6</sub>) ( $\delta$ , ppm): 161.57, 161.55, 151.91, 130.63, 128.74, 126.39 (q,  $J$  = 25.9 Hz), 123.55 (q,  $J$  = 3.4 Hz), 123.34 (q,  $J$  = 216.1 Hz), 121.32, 28.44, 11.50; HR-ESI ([M+H]<sup>+</sup>)  $m/z$  calcd for C<sub>11</sub>H<sub>10</sub>F<sub>3</sub>N<sub>2</sub>O 243.07397; found 243.07412.

### 2-phenyl-7-(trifluoromethyl)quinazolin-4(3H)-one (3r)<sup>9</sup>

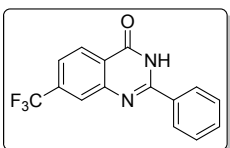

Light yellow solid; m.p. 194-196 °C; IR (KBr,  $\nu$ , cm<sup>-1</sup>): 3206, 3160, 3095, 1670, 1607, 1492; <sup>1</sup>H NMR (400 MHz, DMSO-*d*<sub>6</sub>) ( $\delta$ , ppm): 12.84 (s, 1H), 8.33 (t,  $J$  = 24.8 Hz, 1H), 8.20 (d,  $J$  = 7.6 Hz, 2H), 8.04 (s, 1H), 7.80 (d,  $J$  = 8.4 Hz, 1H), 7.62-7.57 (m, 3H); <sup>13</sup>C NMR (100 MHz, DMSO-*d*<sub>6</sub>) ( $\delta$ , ppm): 162.03, 154.40, 149.27, 134.70 (q,  $J$  = 25.5 Hz), 132.74, 132.28, 129.12 (2C), 128.29 (2C), 128.15, 125.05 (q,  $J$  = 2.9 Hz), 123.98 (q,  $J$  = 206.9 Hz), 122.95, 122.63; ESI-MS ( $m/z$ ) = 291.1 ([M+H]<sup>+</sup>).

## References

1. D. Zhao, T. Wang and J. X. Li, *Chem. Commun.*, 2014, **50**, 6471.
2. L. X. Wang, J. F. Xiang and Y. L. Tang, *Eur. J. Org. Chem.*, 2014, **2014**, 2682.
3. J. X. Chen, D. Z. Wu, F. He, M. C. Liu, H. Y. Wu, J. C. Ding, W. K. Su, *Tetrahedron Lett.*, 2008, **49**, 3814.
4. B. Ma, Y. Wang, J. Peng and Q. Zhu, *J. Org. Chem.*, 2011, **76**, 6362.
5. W. Xu and H. Fu, *J. Org. Chem.*, 2011, **76**, 3846.
6. W. Xu, Y. Jin, H. Liu, Y. Jiang and H. Fu, *Org. Lett.*, 2011, **13**, 1274.
7. C. E. Liu, Q. Y. Yu, J. H. Tang, J. R. Li, *Chin. J. Org. Chem.*, 2012, **3**, 532.
8. M. J. Hour, J. S. Yang, T. L. Chen, K. T. Chen, S. C. Kuo, J. G. Chung, C. C. Lu, C. Y. Chen, Y. H. Chuang, *Eur. J. Med. Chem.*, 2011, **46**, 2709.
9. F. Jens, Z. Hans-Joachim, H. Ines, W. Lothar, M. Thomas, B. Marco, V. K. D. Pascal, H. H. Isolde, R. C. Hugh, D. Jan, *PCT Int. Appl.* (2012), WO 2012028578 A1 20120308.

# The <sup>1</sup>H-NMR and <sup>13</sup>C-NMR Spectra of products

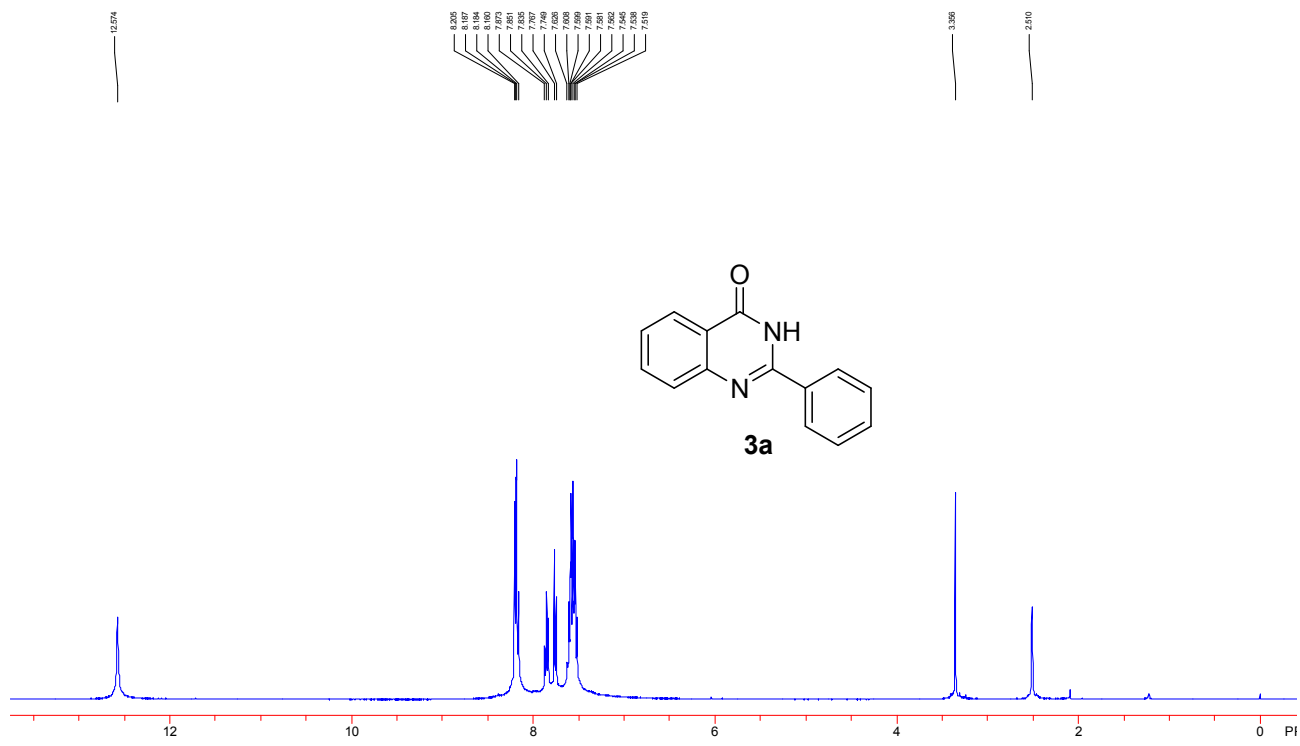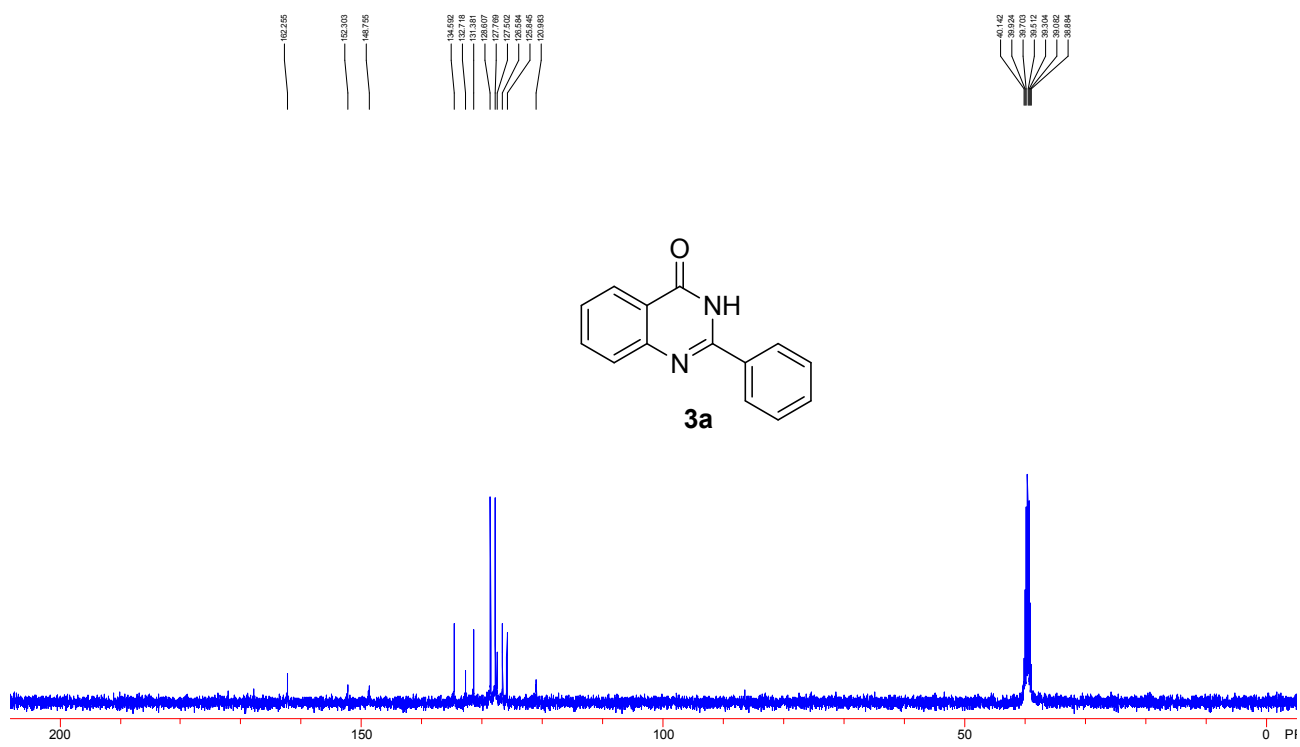

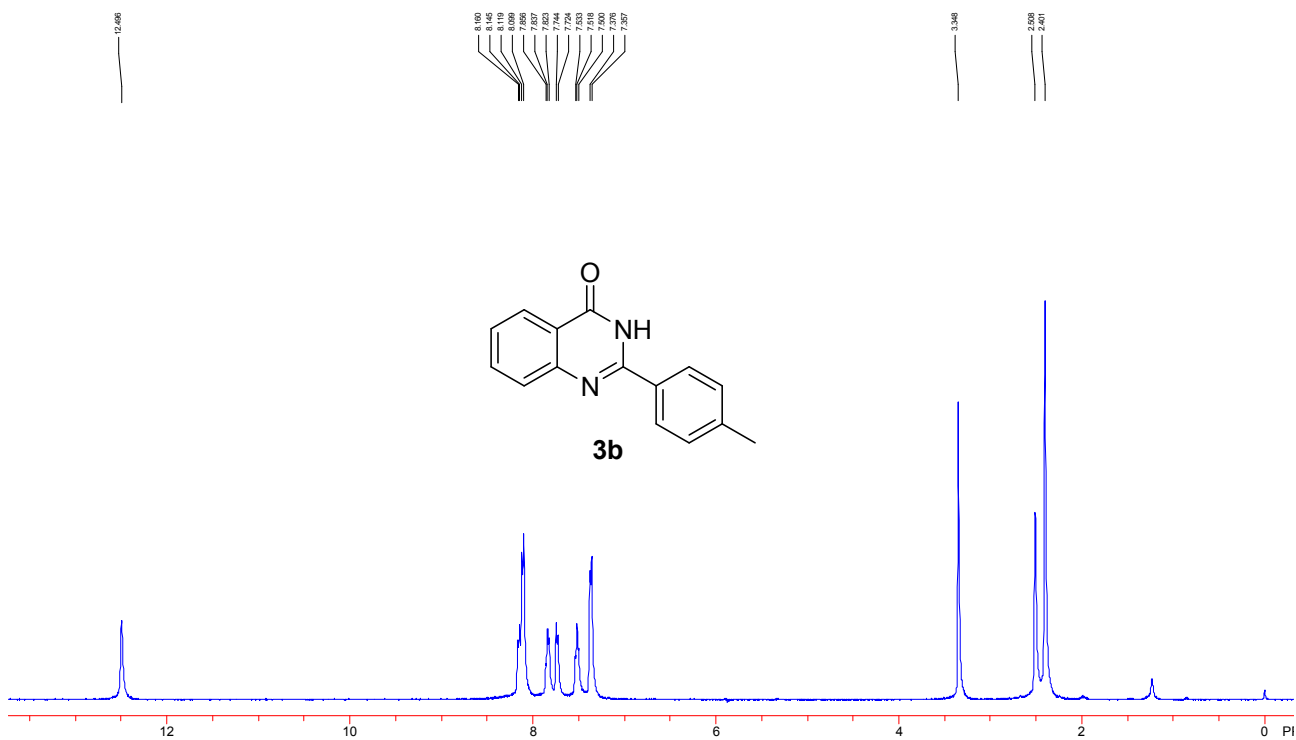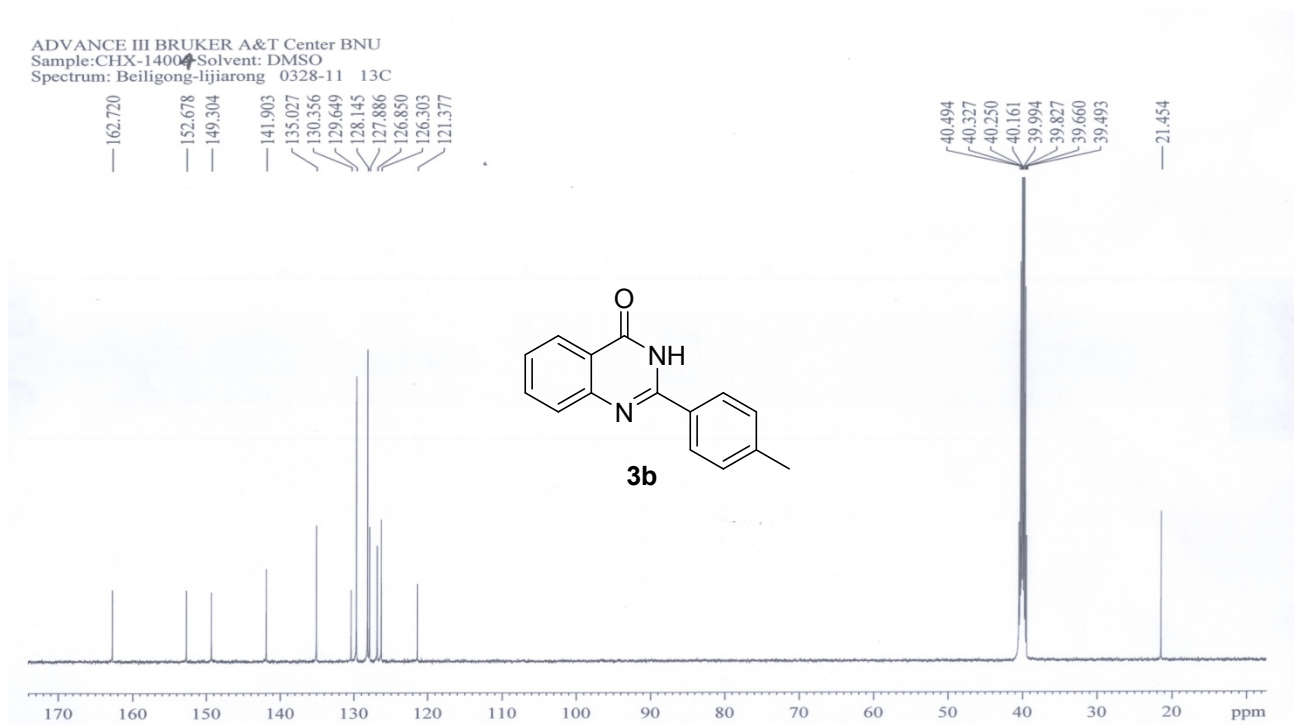

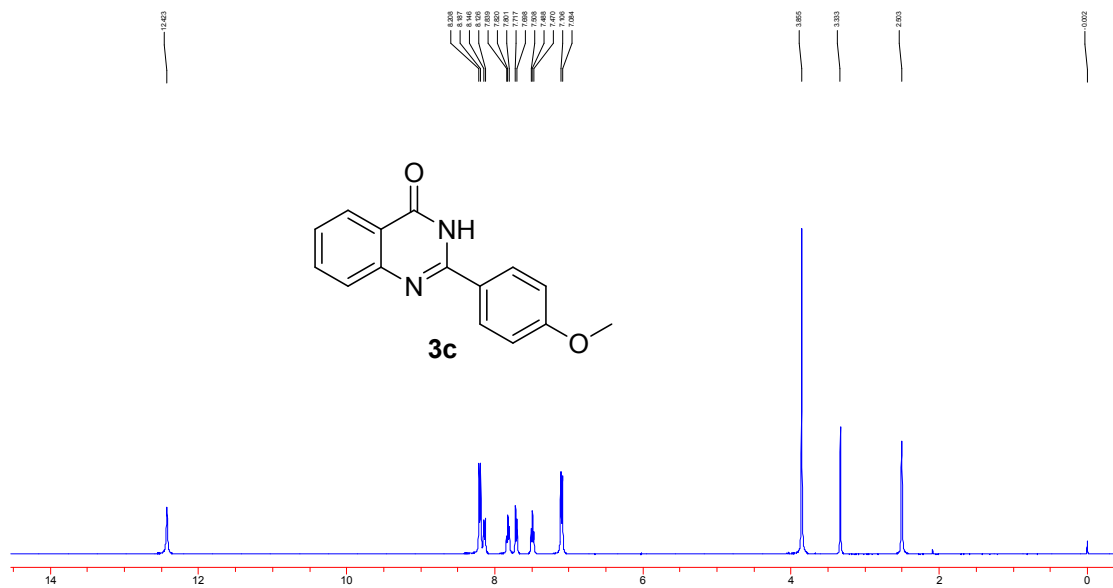

ADVANCE III BRUKER A&T Center BNU  
 Sample: CHX-14009 Solvent: DMSO  
 Spectrum: beiligong-lijiarong 0422-6 13C

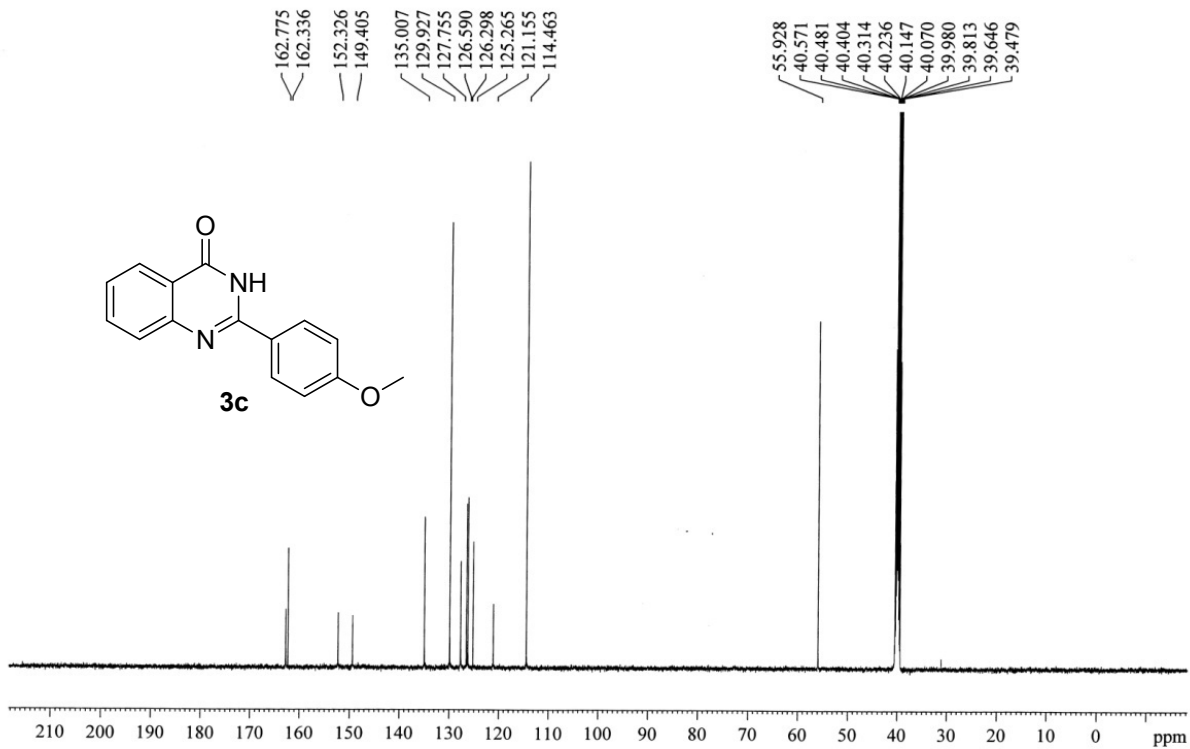

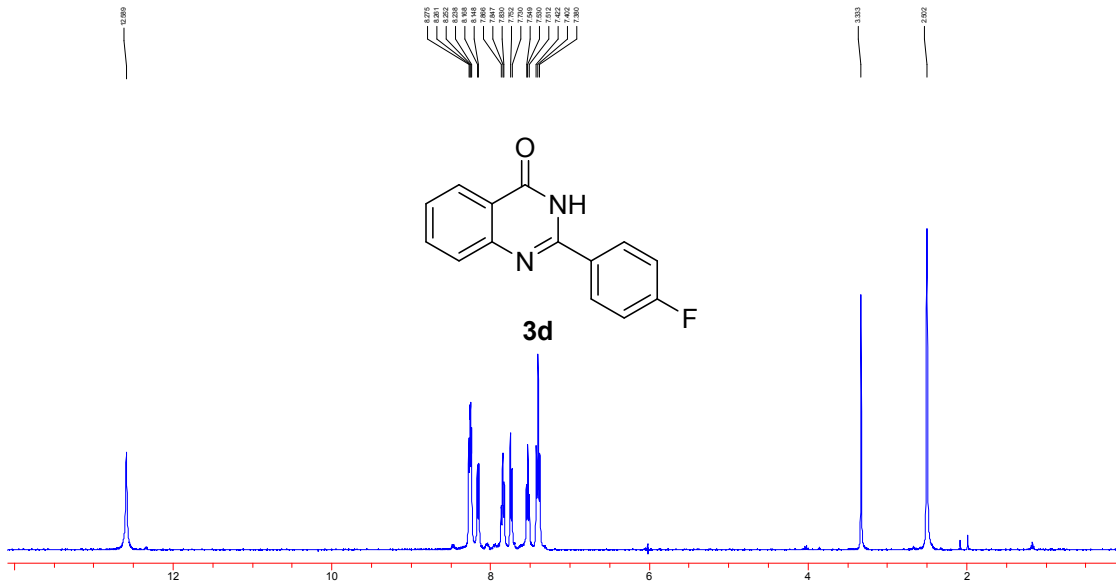

ADVANCE III BRUKER A&T Center BNU  
 Sample: CHX-14007 Solvent: DMSO  
 Spectrum: beiligong-lijiarong 0422-5 13C

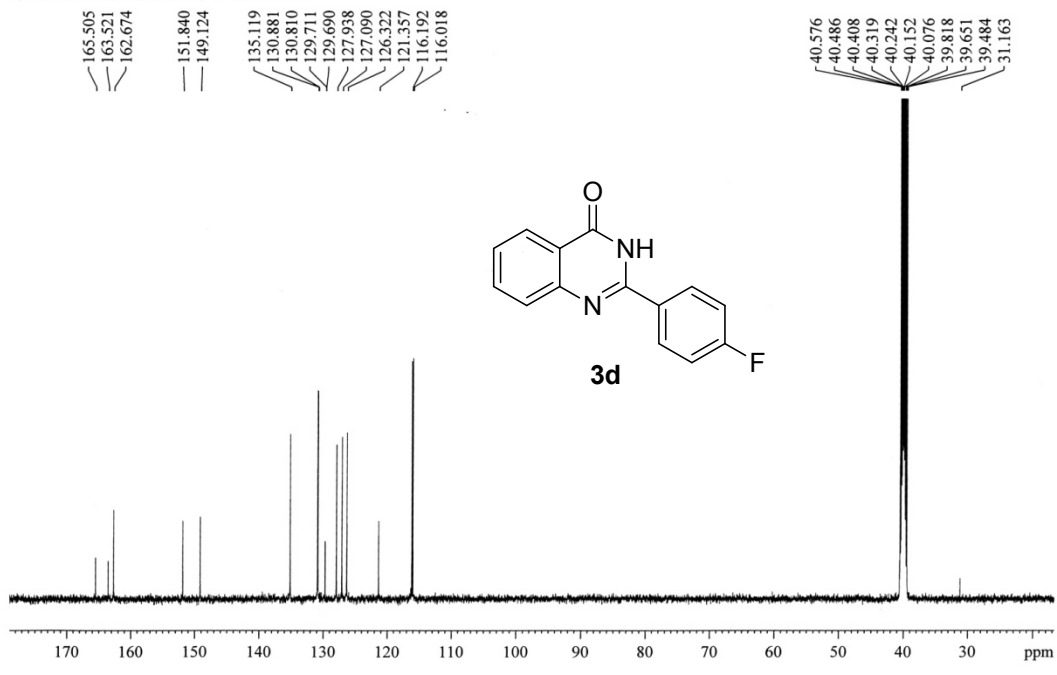



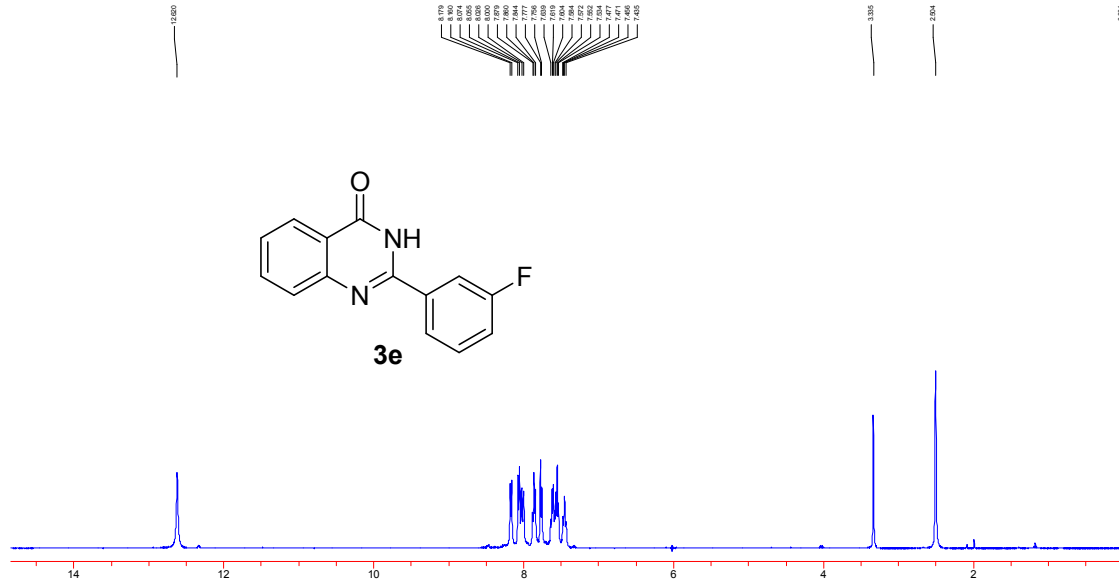

ADVANCE III BRUKER A&T Center BNU  
 Sample: CHX-14010 Solvent: DMSO  
 Spectrum: beiligong-lijiarong 0422-7 13C

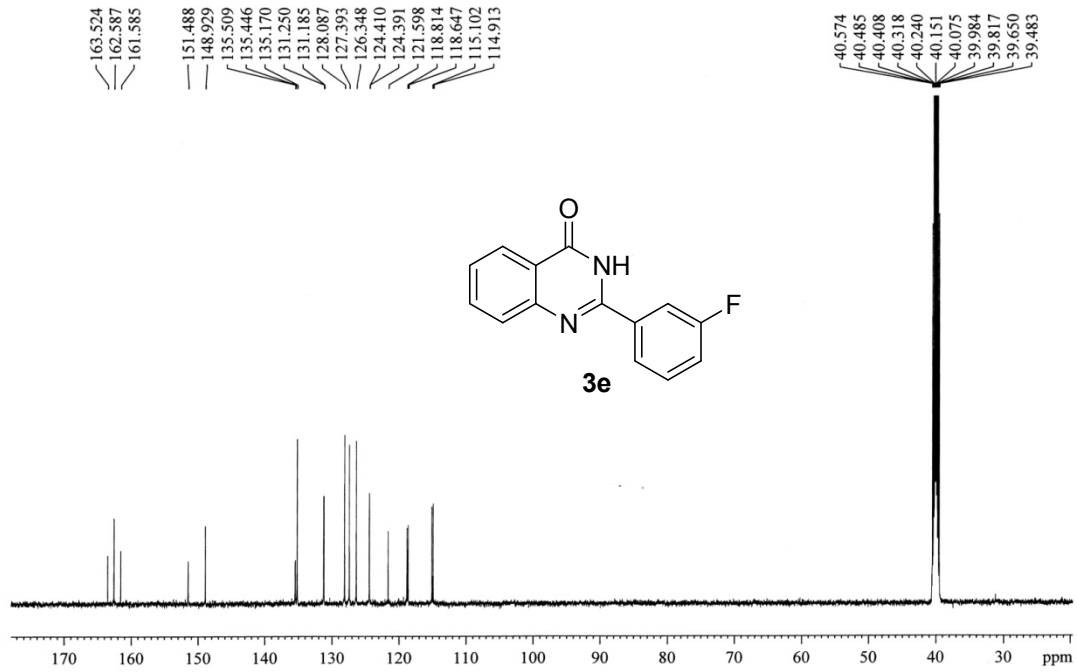

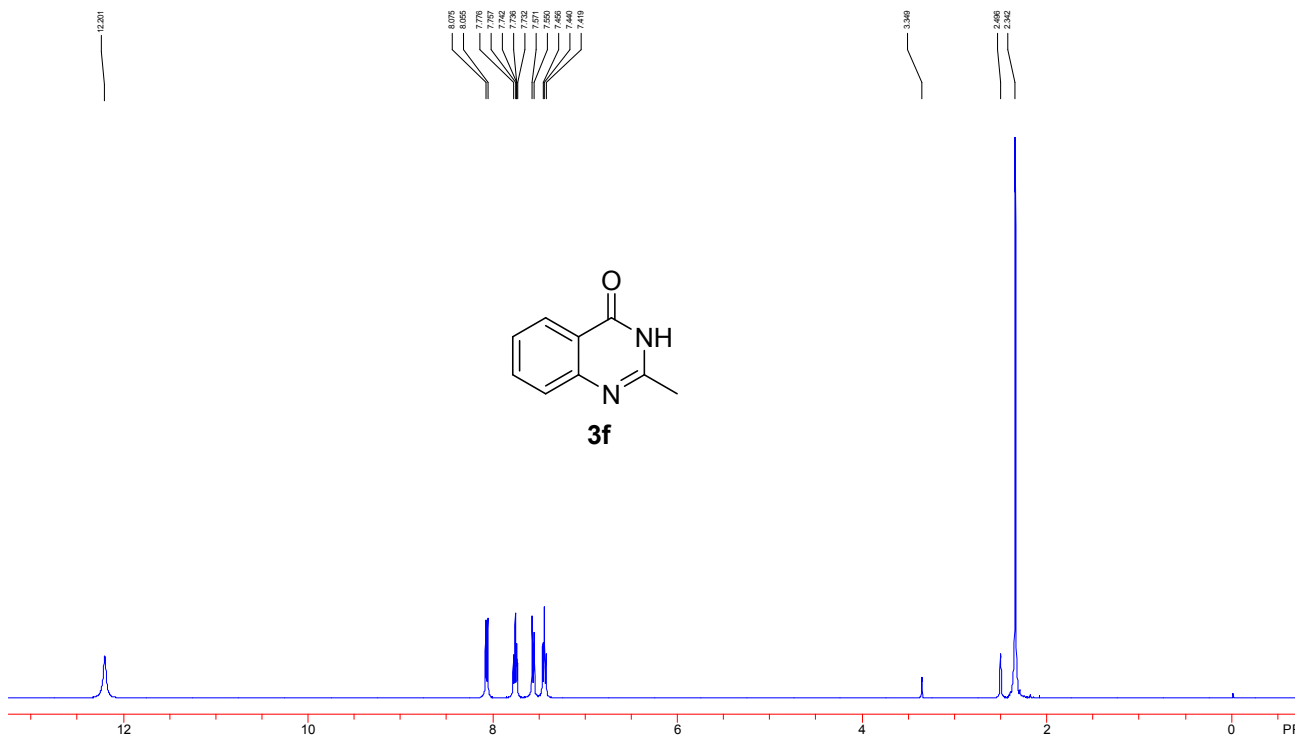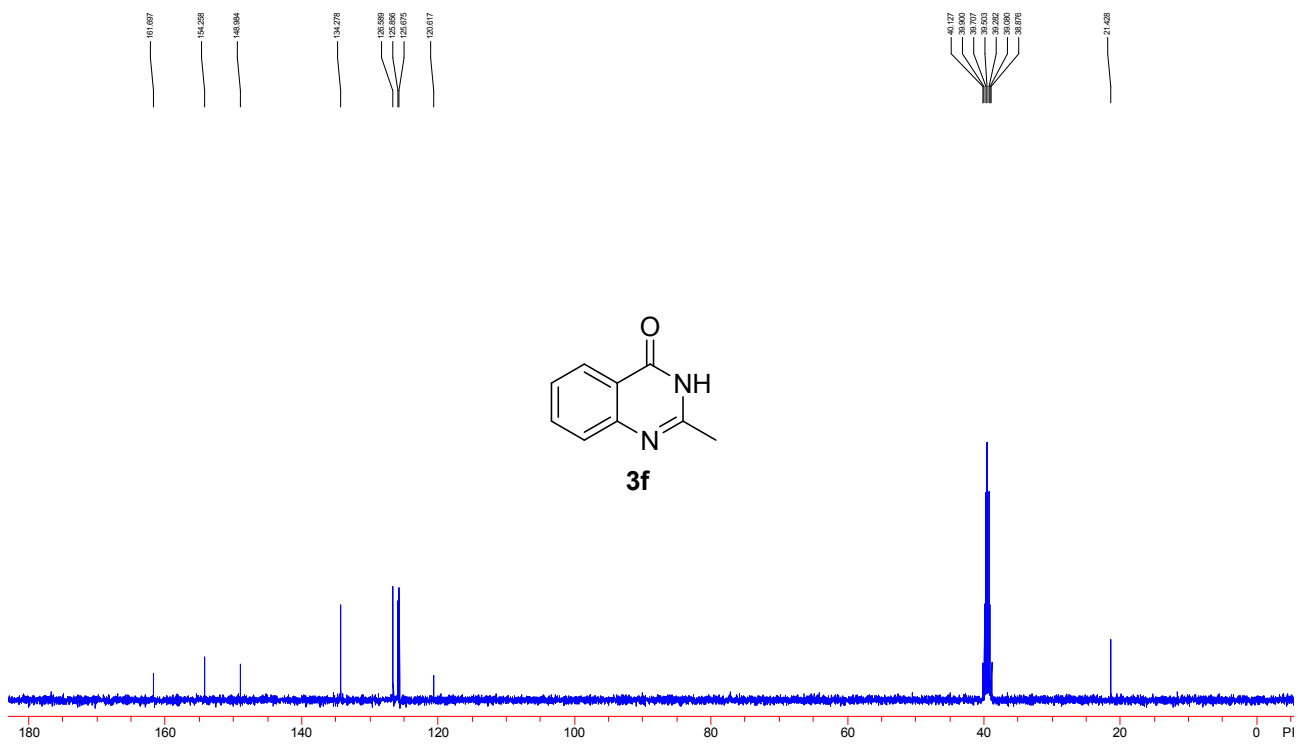

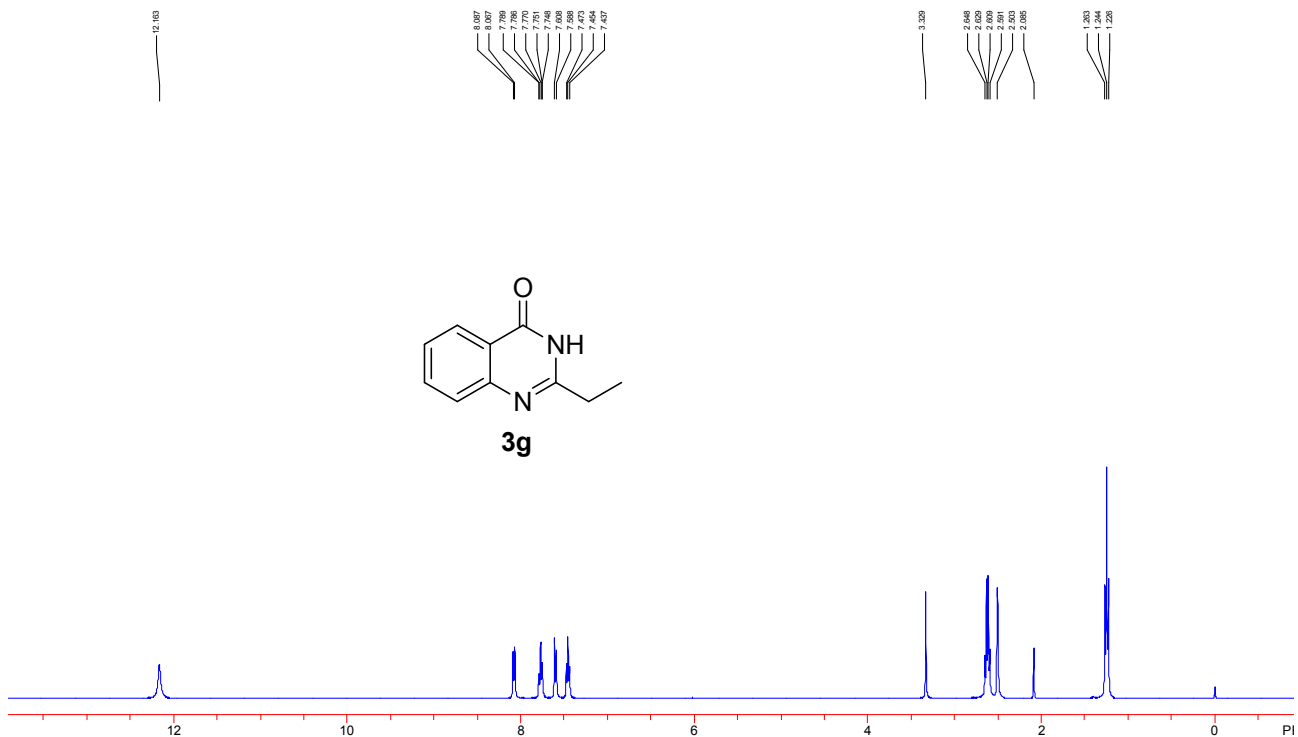

ADVANCE III BRUKER A&T Center BNU  
 Sample: CHX-14018 Solvent: DMSO  
 Spectrum: beiligong-lijiarong 0522-2 13C

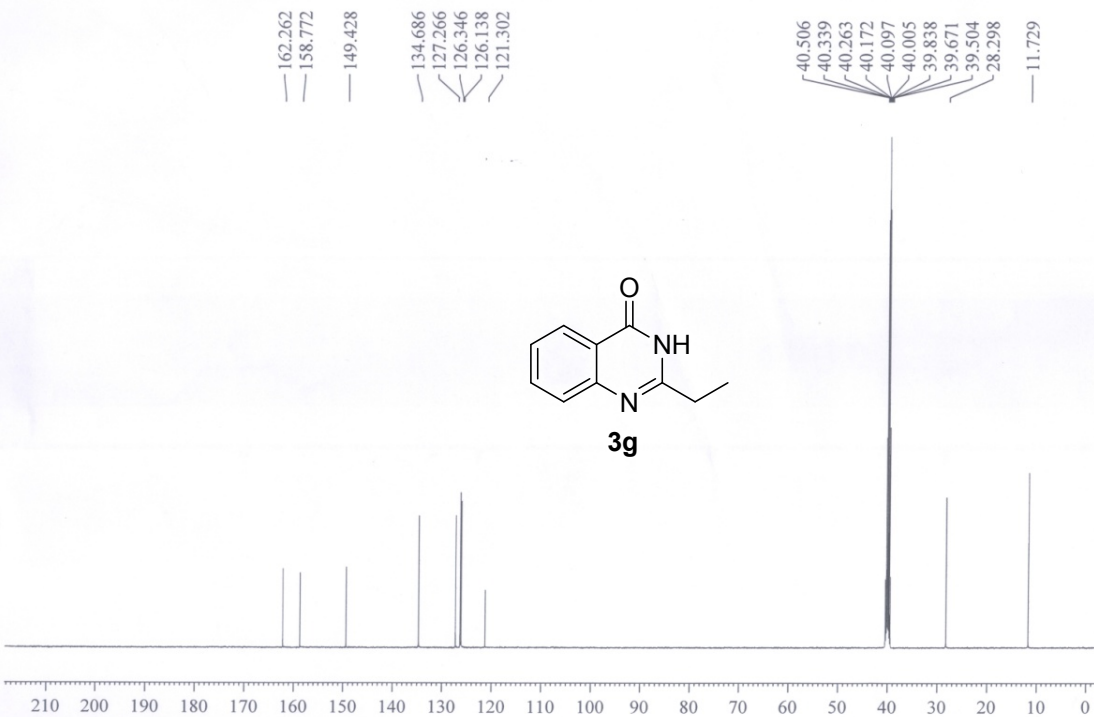

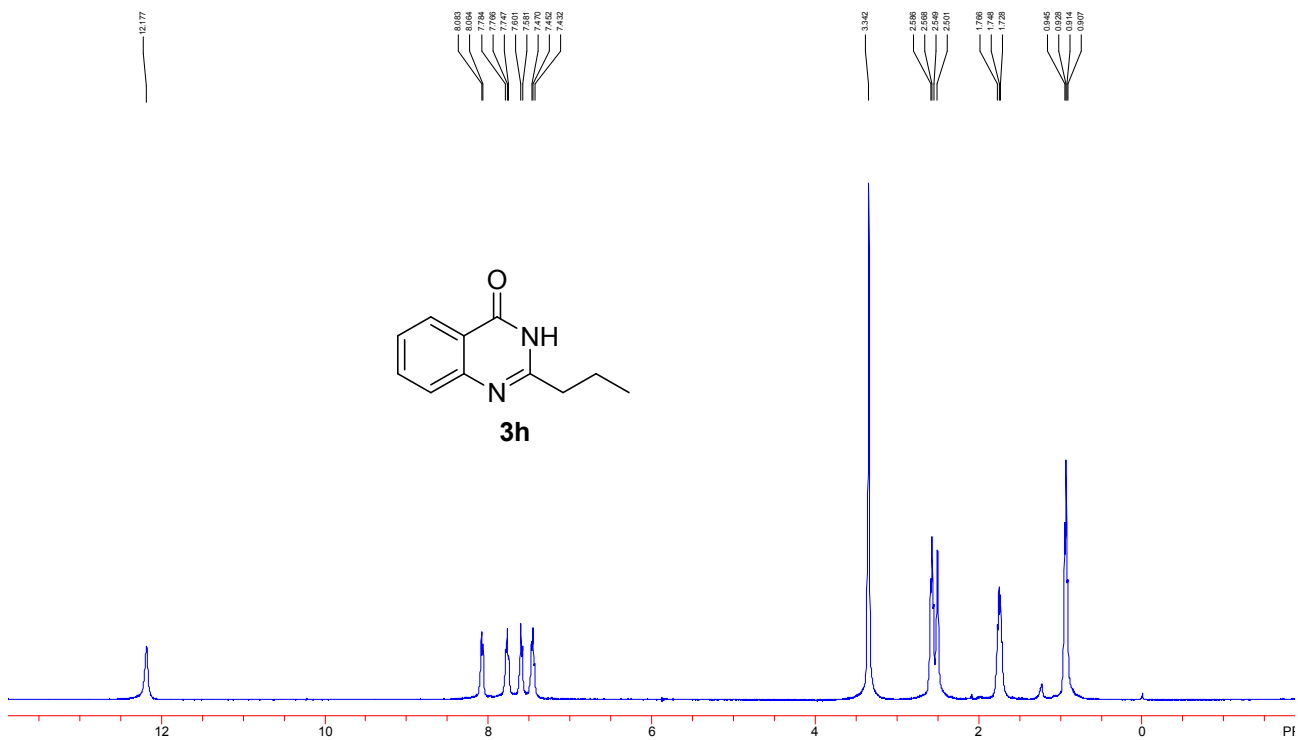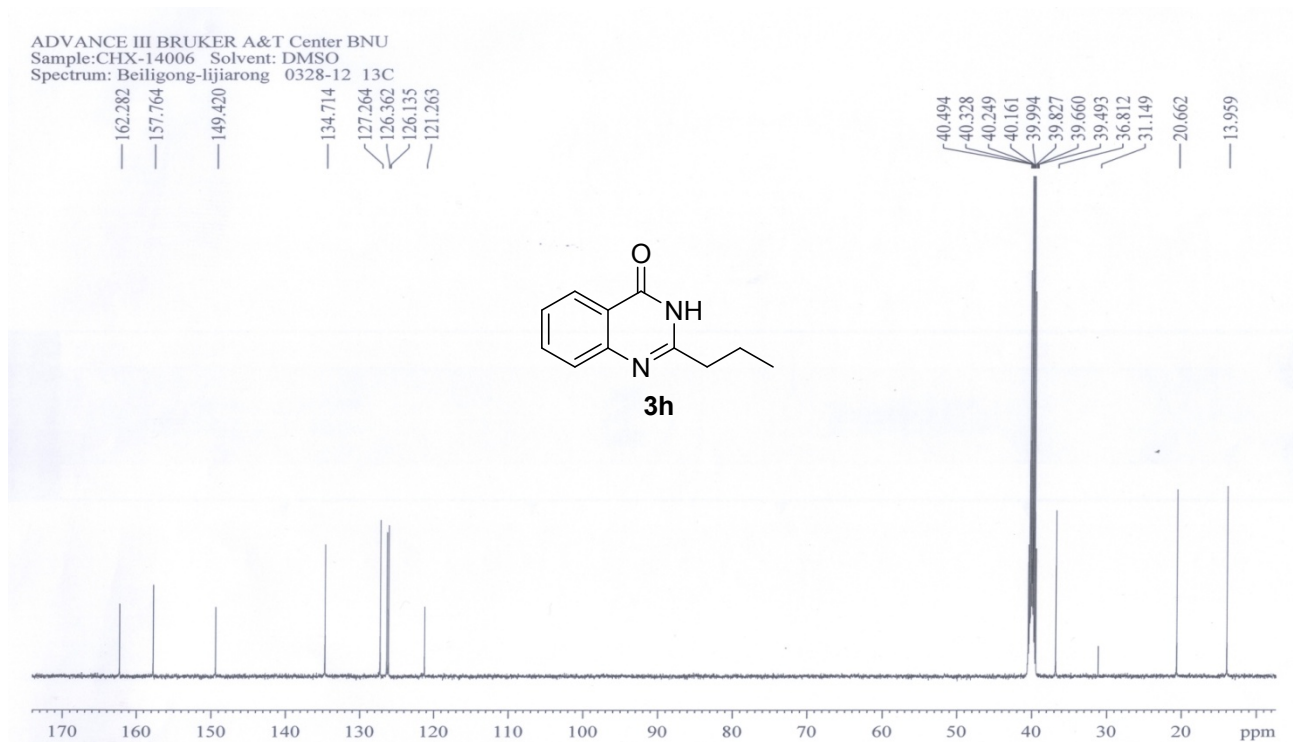

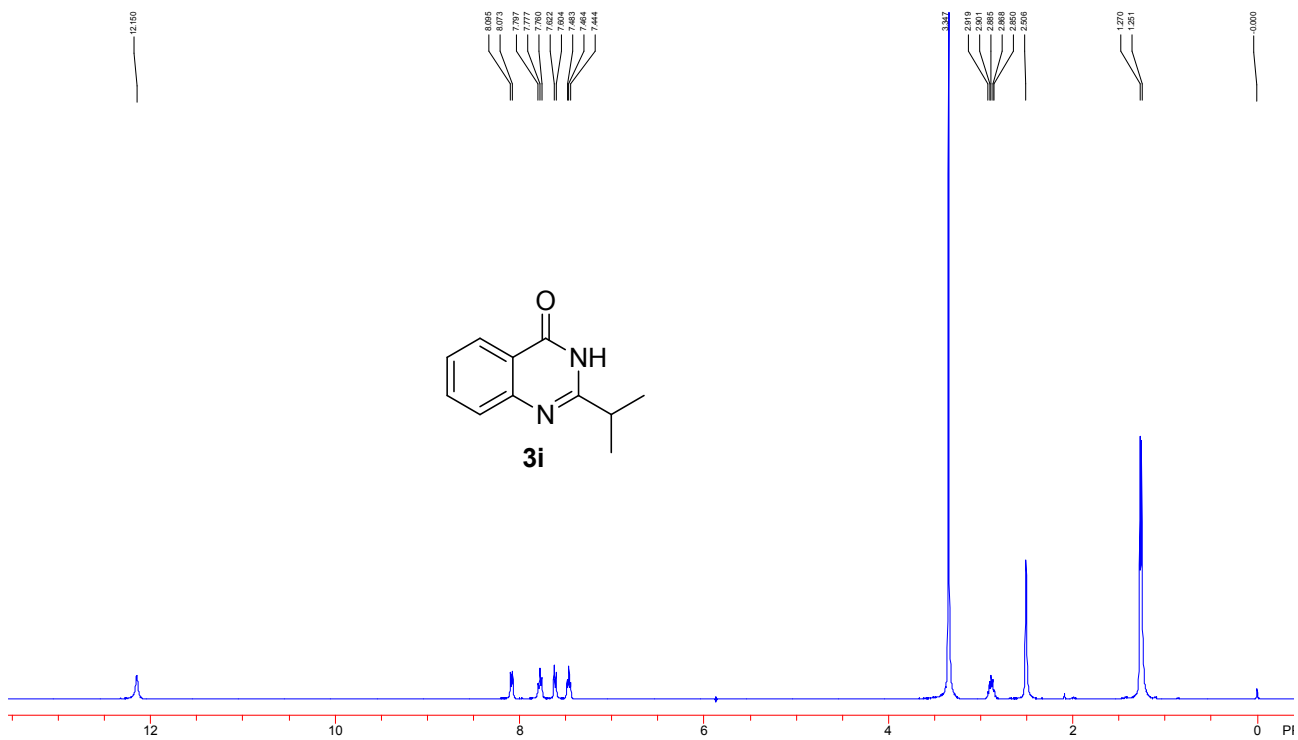

ADVANCE III BRUKER A&T Center BNU  
 Sample: CHX-1400 Solvent: DMSO  
 Spectrum: Beiligong-lijarong 0328-10 13C

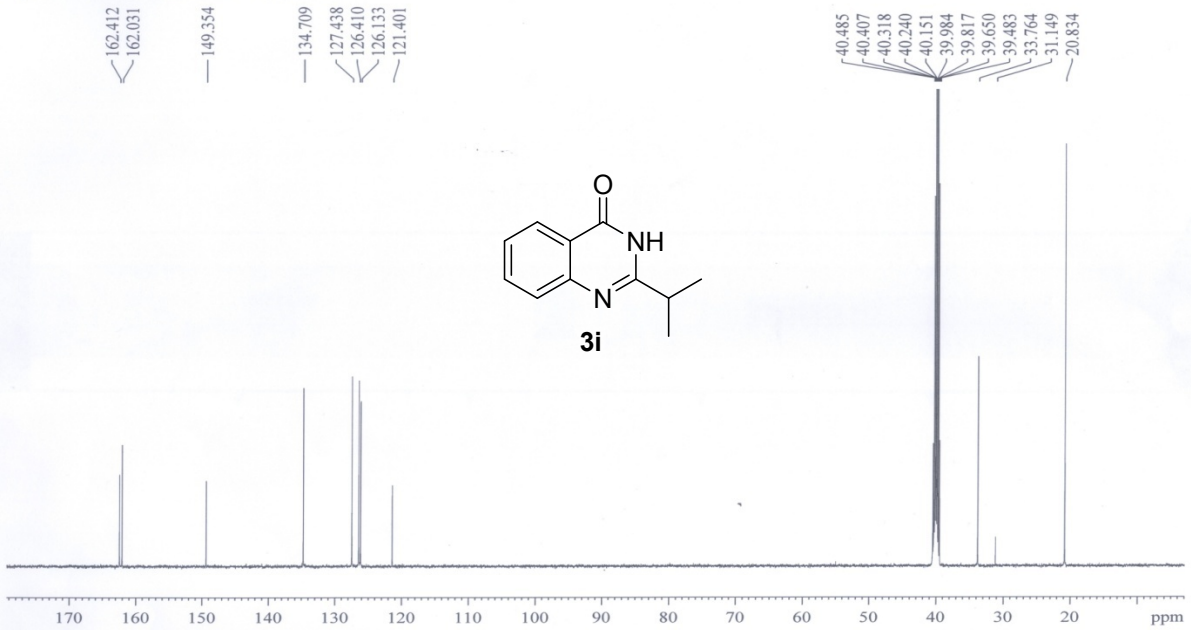

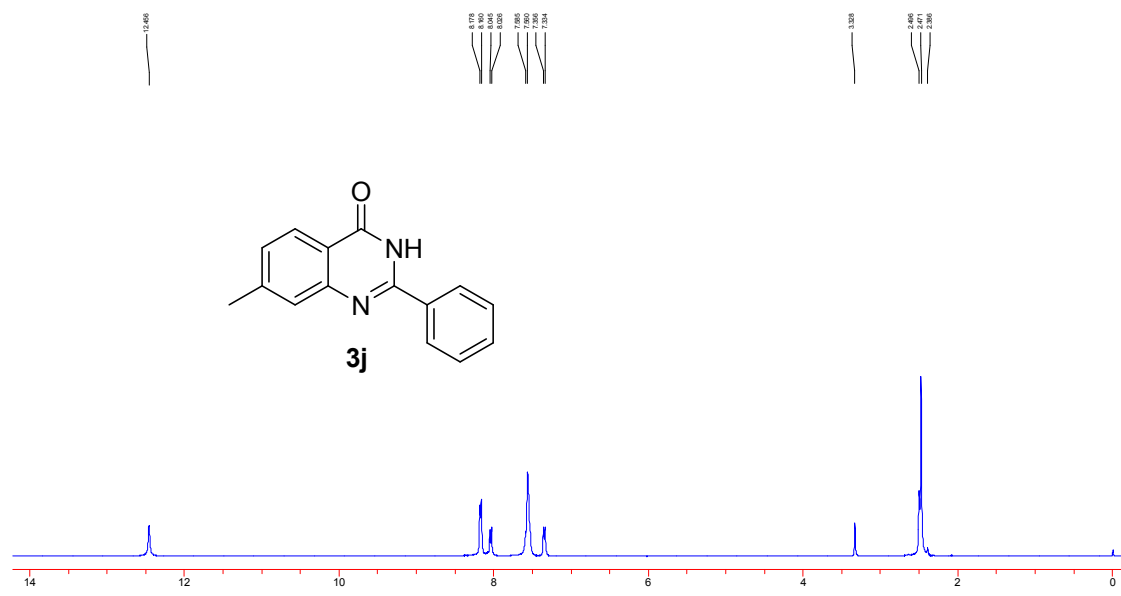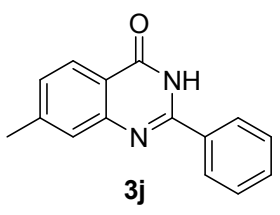

ADVANCE III BRUKER A&T Center BNU  
 Sample: CHX-14012 Solvent: DMSO  
 Spectrum: beiligong-lijiarong 0422-9 13C

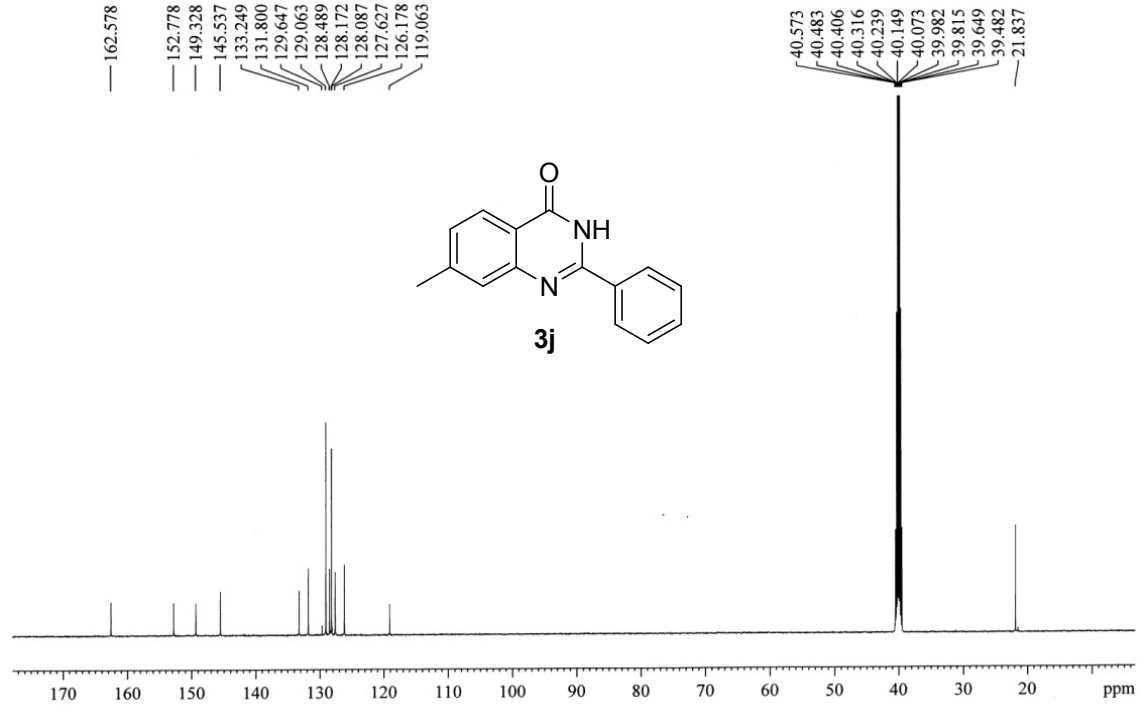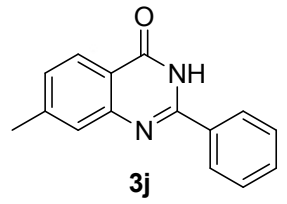

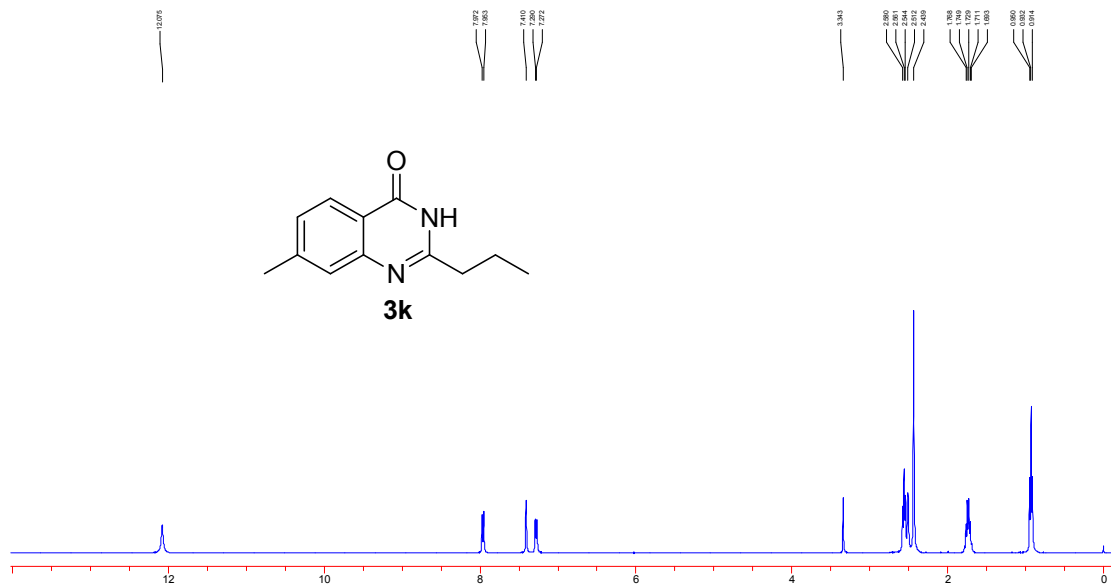

ADVANCE III BRUKER A&T Center BNU  
 Sample: CHX-14011 Solvent: DMSO  
 Spectrum: beiligong-lijiarong 0422-8 13C

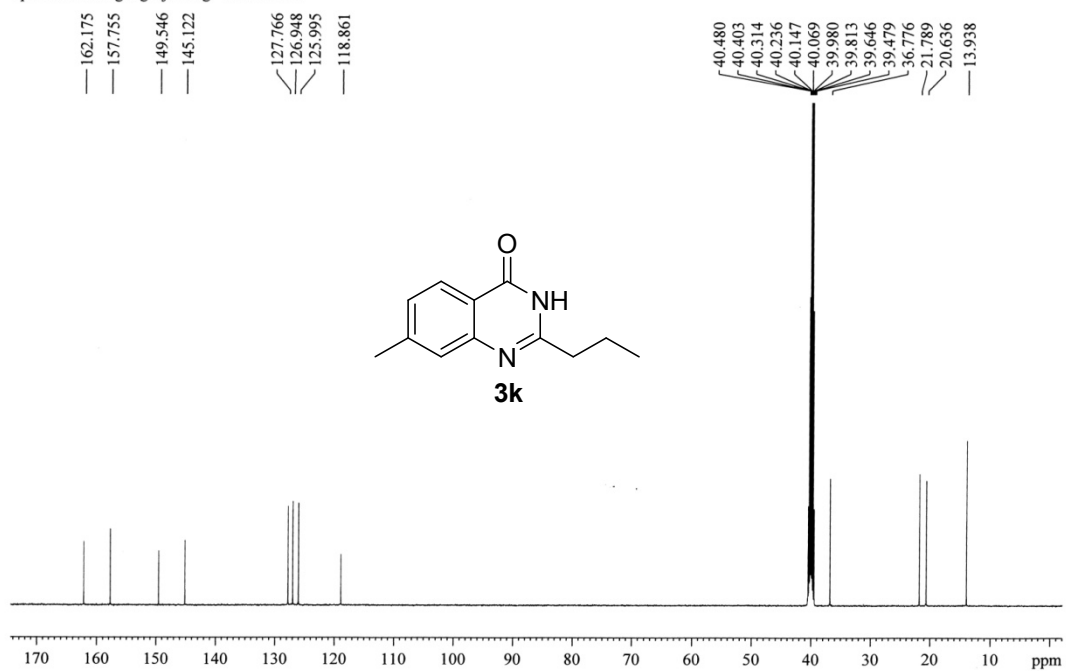

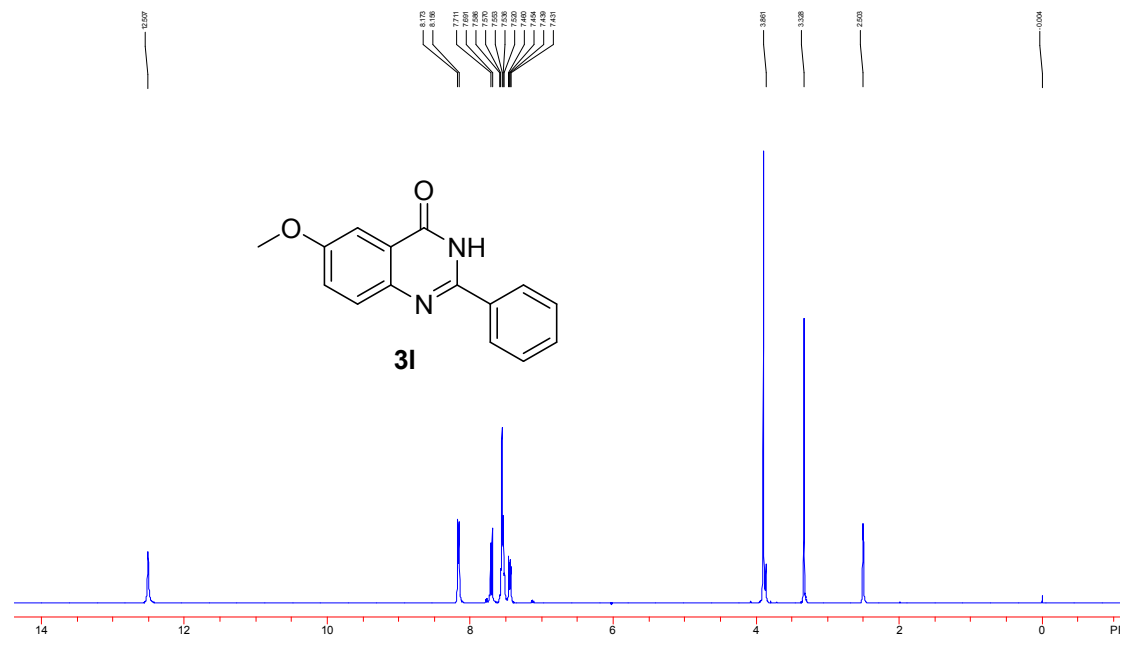

ADVANCE III BRUKER A&T Center BNU  
 Sample: CHX-14021 Solvent: DMSO  
 Spectrum: beiligong-lijiaorong 0522-3 13C

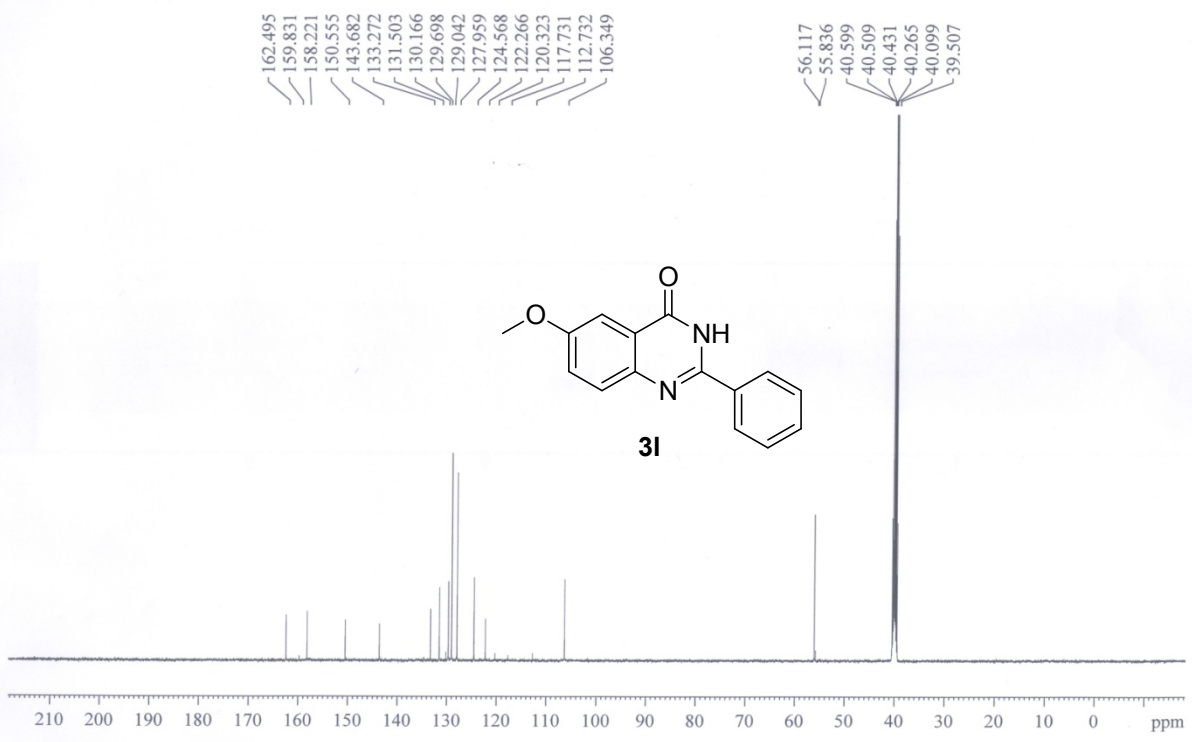



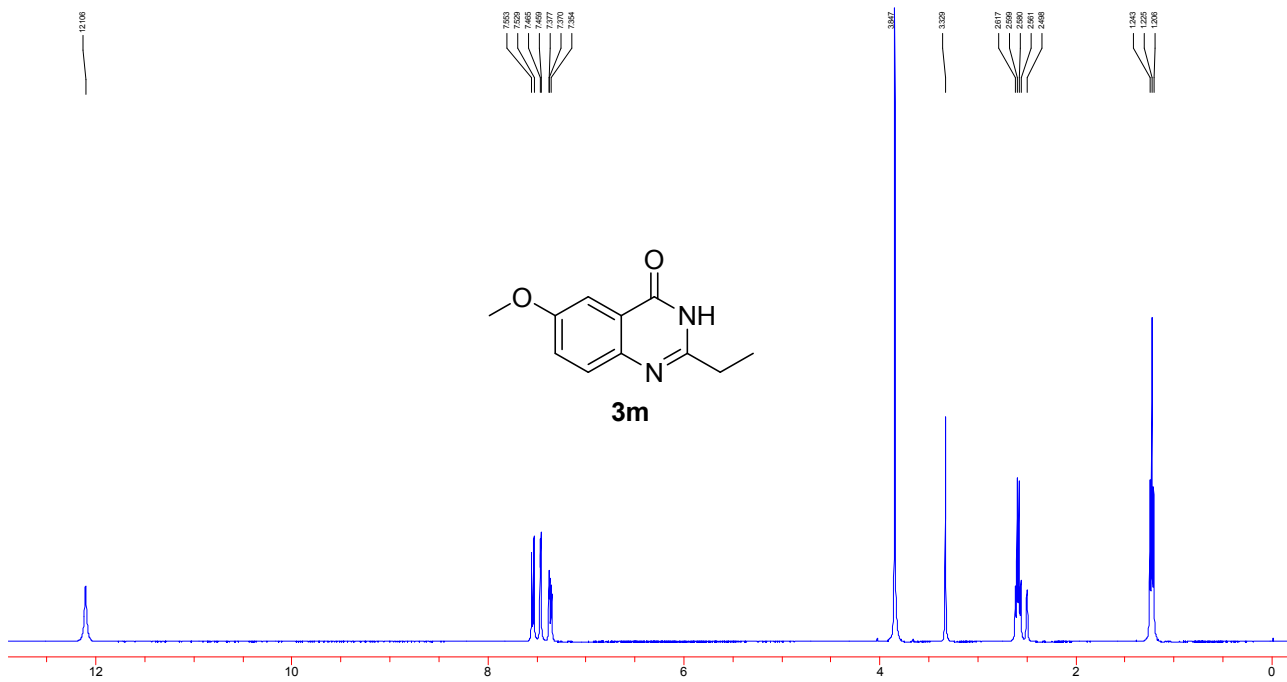

ADVANCE III BRUKER A&T Center BNU  
 Sample: CHX-14022 Solvent: DMSO  
 Spectrum: beiligong-lijiarong 0522-4 13C

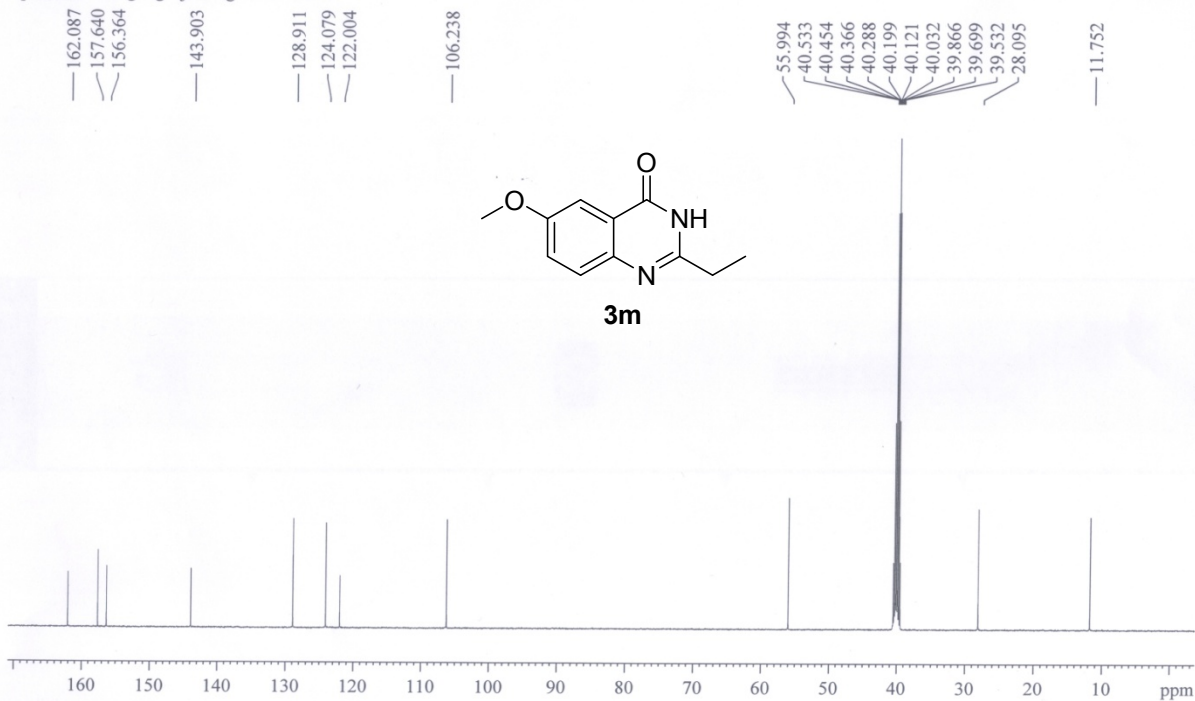



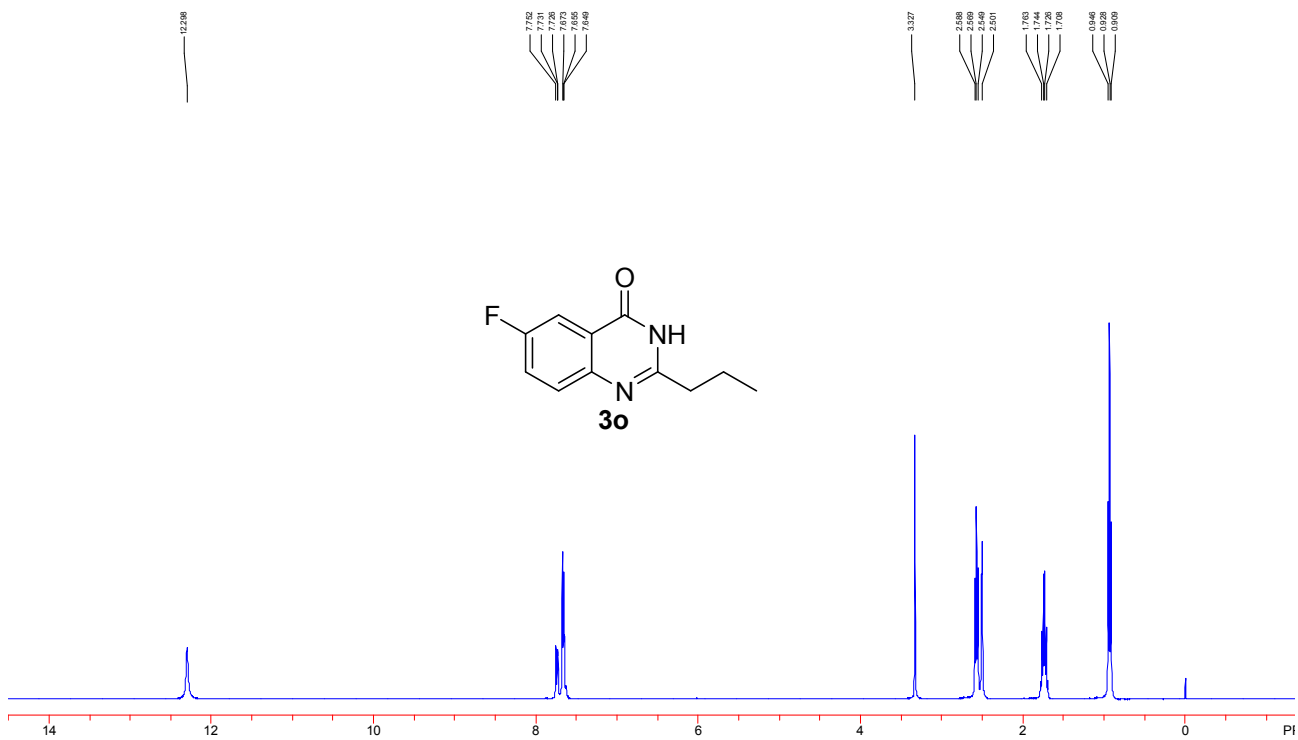

ADVANCE III BRUKER A&T Center BNU  
 Sample: CHX-14016 Solvent: DMSO  
 Spectrum: beiligong-lijiarong 0522-1 13C

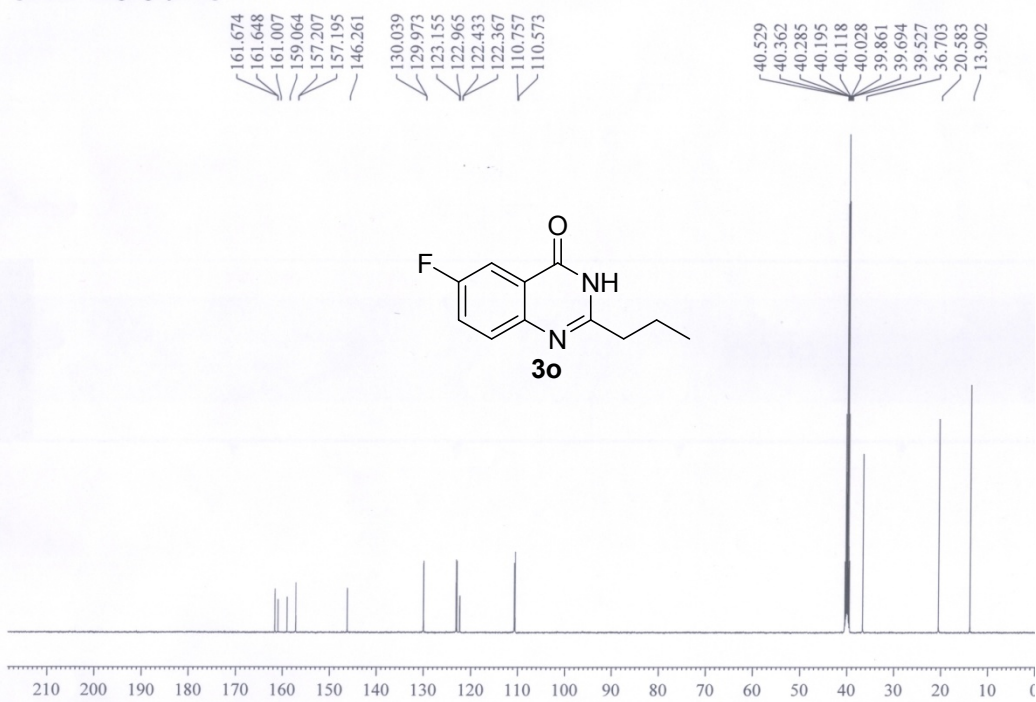

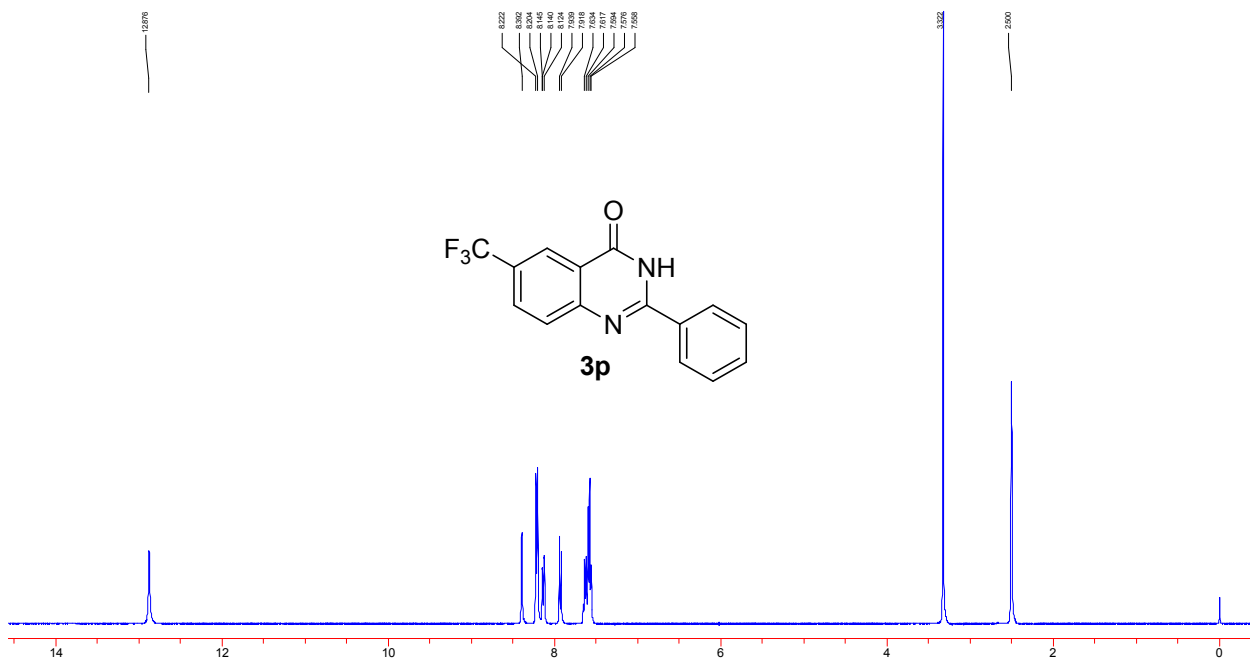

ADVANCE III BRUKER A&T Center BNU  
 Sample: CHX-14019 Solvent: DMSO  
 Spectrum: beiligong-lijiarong 0522-5 13C

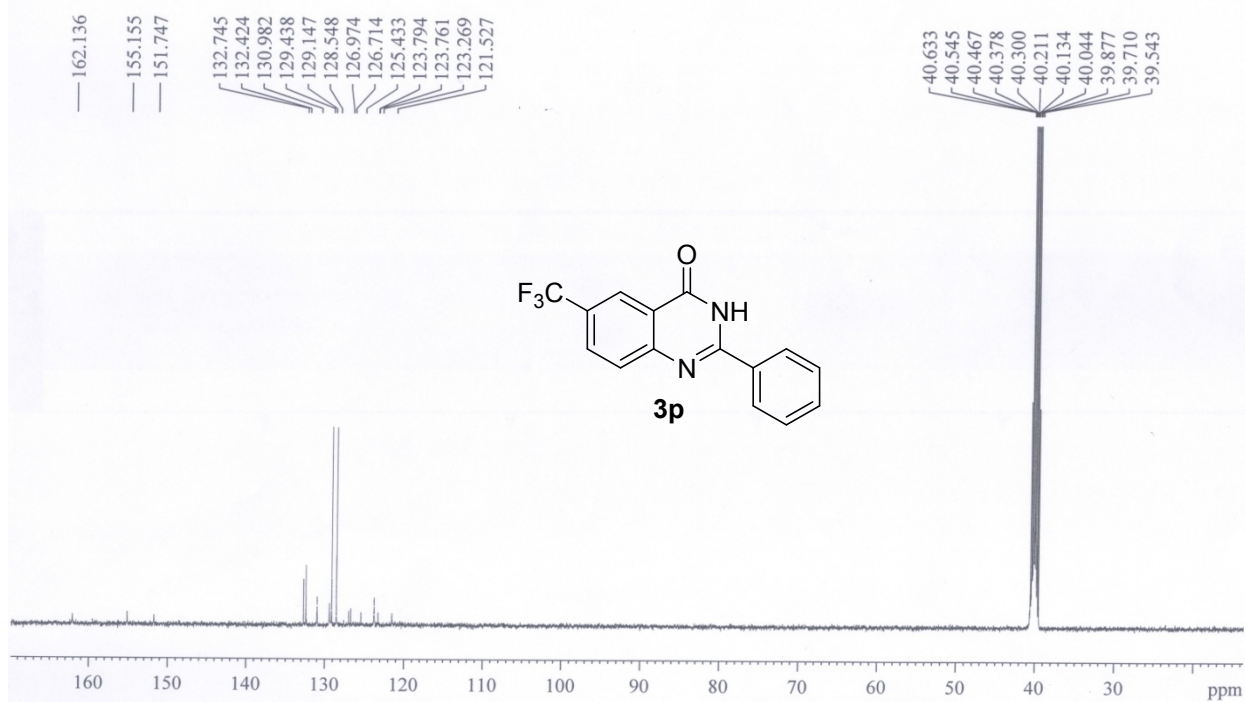

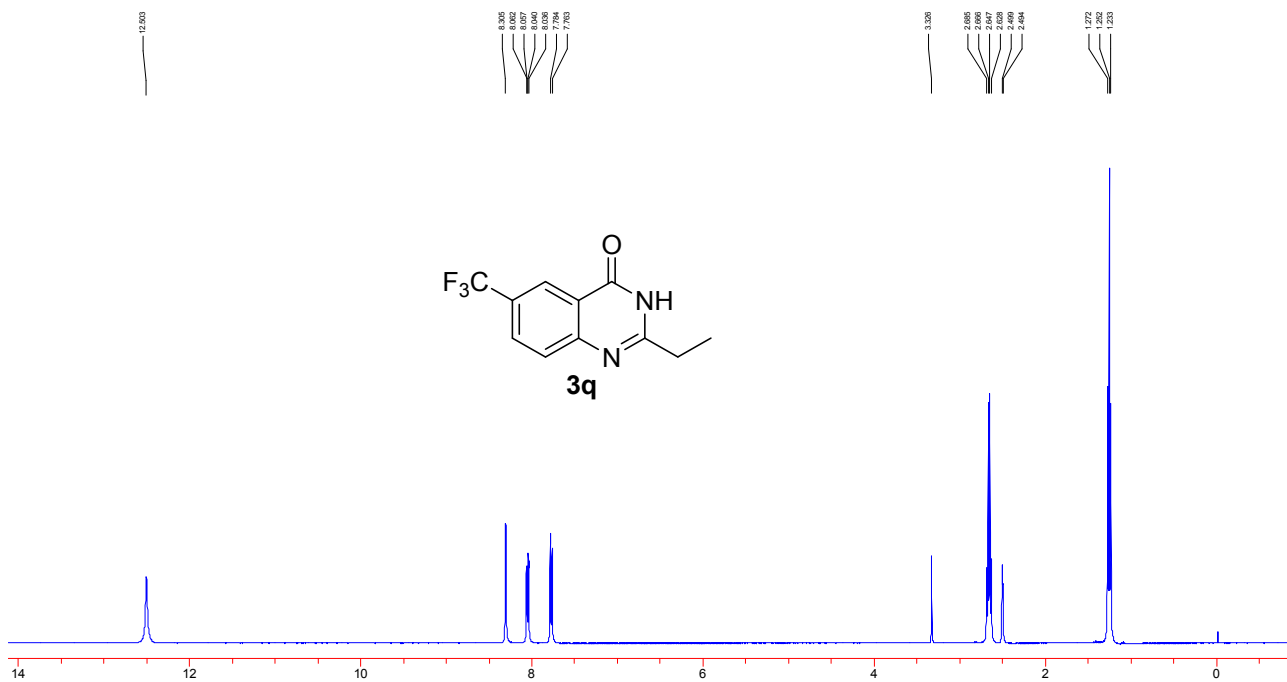

ADVANCE III BRUKER A&T Center BNU  
 Sample: CHX-14020 Solvent: DMSO  
 Spectrum: beiligong-lijiarong 0522-6 13C

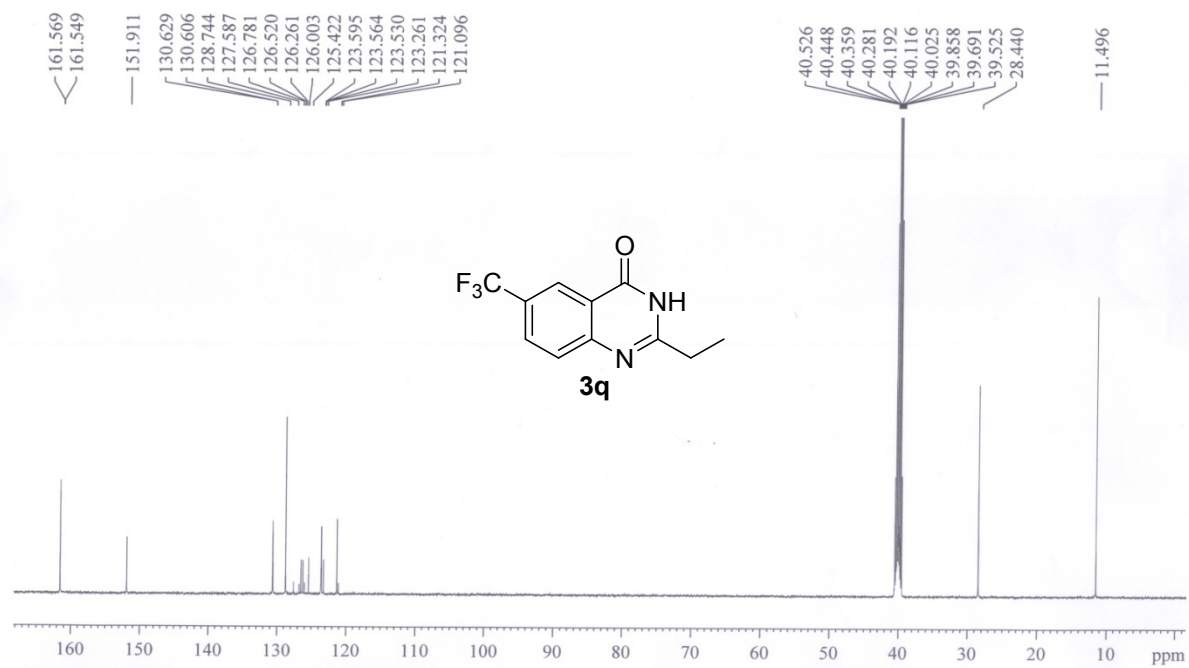

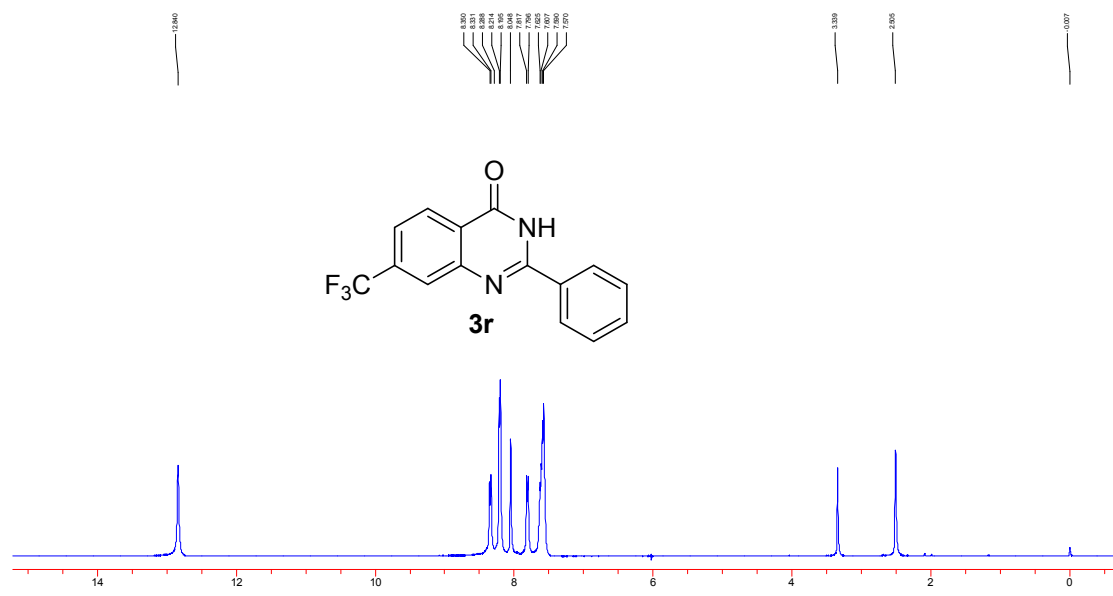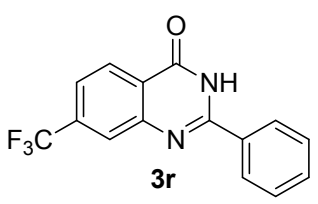

ADVANCE III BRUKER A&T Center BNU  
 Sample: CHX-14013 Solvent: DMSO  
 Spectrum: beiligong-lijiarong 0422-10 13C

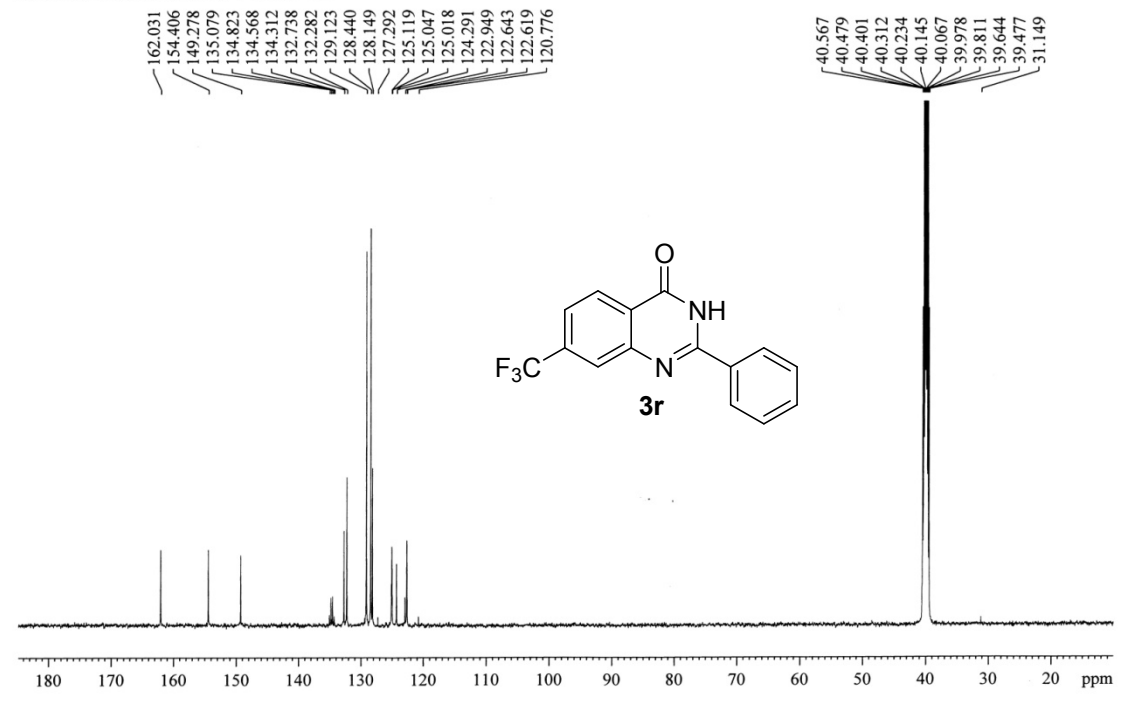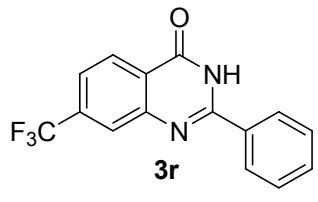

Supplement: c4ra08031a1.pdf [file c4ra08031a1.pdf]
